1 **Title**

2 Motor fatigability as evoked by repetitive movements results from a gradual breakdown of  
3 surround inhibition

4

5 **Authors and Affiliations**

6 Marc Bächinger<sup>1,2,+\*</sup> Rea Lehner<sup>1,2,+</sup> Felix Thomas<sup>1,2</sup> Samira Hanimann<sup>1</sup>, Joshua Henk  
7 Balsters<sup>1,3</sup>, Nicole Wenderoth<sup>1,2\*</sup>

8

9 <sup>1</sup> Neural Control of Movement Lab, Department of Health Sciences and Technology, Zurich,  
10 Switzerland

11 <sup>2</sup> Neuroscience Center Zurich (ZNZ), University of Zurich, Federal Institute of Technology  
12 Zurich, University and Balgrist Hospital Zurich, Zurich, Switzerland

13 <sup>3</sup> Department of Psychology, Royal Holloway University of London, Egham, Surrey, United  
14 Kingdom

15 + These authors contributed equally.

16

17 **\* Corresponding Authors**

18 Dr. Marc Bächinger and Prof. Nicole Wenderoth

19 Neural Control of Movement Lab

20 Department of Health Sciences and Technology

21 ETH Zurich, Switzerland

22 Winterthurerstrasse 190, 8057 Zurich

23 Phone: +41 44 635 50 87

24 marc.baechinger@hest.ethz.ch, nicole.wenderoth@hest.ethz.ch

1  
2  
3  
4  
5  
6  
7  
8  
9  
10  
11  
12  
13  
14  
15  
16  
17  
18  
19  
20  
21  
22  
23  
24

55 pages, 7 figures; Summary: 150 w., Introduction: 608 w., Methods: 5400 w., Results: 2744 w., Discussion 2185 w.

## **Summary (150 w.)**

Motor fatigability emerges when demanding task are executed over an extended period of time. Here, we used repetitive low-force movements, which cause a gradual reduction in movement speed (or “motor slowing”), to study the central component of fatigability in healthy adults. We show that motor slowing is associated with a gradual increase of net excitability in the motor network and, specifically, in primary motor cortex (M1), which results from overall disinhibition. Importantly, we link performance decrements to a breakdown of surround inhibition in M1, which causes high coactivation of antagonistic muscle groups. This is consistent with the model that a loss of inhibitory control might broaden the tuning of population vectors such that movement patterns become more variable, ill-timed and effortful. We propose that the release of inhibition in M1 is an important mechanism underpinning motor fatigability and, potentially, also pathological fatigue as frequently observed in patients with brain disorders.

## **Keywords**

Fatigue, motor slowing, repetitive movements, functional magnetic resonance imaging, electrophysiology, transcranial magnetic stimulation.

## 1 **Introduction**

2 Motor fatigability is a phenomenon experienced in everyday life during exhaustive exercise or  
3 physically demanding tasks. Enhanced motor fatigability is a prevalent symptom of many brain  
4 disorders (such as stroke, Parkinson's disease, or traumatic brain injury) which typically  
5 affects submaximal movements that are required for many daily life tasks (Kluger et al., 2013,  
6 Manjaly et al., 2019). In addition to the clinical data, experimental evidence in healthy  
7 participants has shown that fatigability arises, at least partly, at the supraspinal level  
8 suggesting that the descending drive from motor cortex is suboptimal once it is fatigued  
9 (Gandevia et al., 1996; Smith et al., 2007; Sogaard et al., 2006). While this reduction in central  
10 drive has been associated with diverse activity changes within cortico-subcortical networks  
11 (van Duinen et al., 2007; Post et al., 2009a), our current understanding of the  
12 neurophysiological mechanisms underlying central fatigability is still limited.

13 Here we investigate the neurophysiological mechanisms associated with performance  
14 fatigability (i.e. the objectively measurable performance decrease associated with fatigue  
15 itself; (Kluger et al., 2013)) of repetitive submaximal movements. It has been demonstrated  
16 previously that the performance of repetitive movements tends to deteriorate over time (Dolan  
17 and Adams, 1998; Miller et al., 1993). While this finding is not unexpected for fatiguing  
18 contractions (e.g., at high force levels), a similar phenomenon has been demonstrated for  
19 movements executed with submaximal forces. For example, 7-9 seconds of finger tapping at  
20 the maximal voluntary rate (MVR) is sufficient to induce a significant performance decrease  
21 (Aoki et al., 2003; Rodrigues et al., 2009). A similar phenomenon also emerges for skilled  
22 motor tasks such as motor sequence tapping involving multiple fingers, a task where the  
23 tapping rate of each finger is well below the maximal frequency observed for single digit  
24 tapping (Brawn et al., 2010). Once the finger sequence is over-learned, the initial tapping  
25 speed increases but a pronounced pattern of slowing is observed during a period of tapping

1 for 30 s. We will refer to this characteristic decrease in movement speed as “motor slowing”  
2 for the remainder of this manuscript.

3 The neurobiological underpinnings of motor slowing are largely unknown. Previous studies  
4 have shown that motor slowing is robustly evoked by prolonged finger tapping but markers of  
5 peripheral or muscular fatigue are virtually unchanged (Arias et al., 2015; Madrid et al., 2016;  
6 Rodrigues et al., 2009), giving rise to the hypothesis that supraspinal mechanisms play a major  
7 role in evoking this phenomenon. Moreover, slowed motor execution is a hallmark of healthy  
8 aging (Mattay et al., 2002; Yordanova et al., 2004) and associated with a dysregulation of  
9 motor cortex excitability (Teo et al., 2012a). Together, these findings point towards a  
10 supraspinal locus of the phenomenon but it is still unclear which neurophysiological or  
11 computational mechanisms cause motor slowing during repetitive movements. Here we aim  
12 to unravel the neurobiological underpinnings of motor slowing using a multimodal approach  
13 involving functional magnetic resonance imaging (fMRI) to identify which whole-brain networks  
14 might mediate motor slowing, electroencephalography (EEG) to measure cortical activity  
15 during recovery from motor slowing and, finally, transcranial magnetic stimulation (TMS) to  
16 probe changes within different cortical circuits in primary motor cortex (M1). We show that  
17 motor slowing is a general phenomenon that is observed independent of the effectors or  
18 muscle groups involved, and also independent of the complexity of the repetitive movement  
19 task. Further we show in a series of functional imaging and neurophysiological experiments  
20 that motor slowing is associated with an increase of the excitation-inhibition ratio within the  
21 motor network and, particularly, in M1. Our main finding is that there is a breakdown of  
22 surround inhibition in M1, leading to an increase in coactivation of antagonistic muscle groups,  
23 which ultimately causes the slowing of repetitive movements.

24

## 1 Results

2 Our general paradigm (Figure 1A) required healthy, young volunteers to perform repetitive  
3 movements at maximal speed either for a period of at least 30 s (slowing condition) or for only  
4 10 s (control condition). Both conditions were followed by a 30 s break (recovery period). Motor  
5 slowing was defined as a significant reduction of movement speed (measured in movement  
6 cycles per 10 s; see methods) over the course of the slowing conditions in comparison to the  
7 much shorter control conditions, which were included to prevent pacing strategies (see  
8 methods for further details). We first asked whether motor slowing is a general phenomenon  
9 that can be observed irrespective of the effector performing the repetitive movement at  
10 maximal speed. In the first experiment, participants (n=12) executed repetitive alternating left  
11 and right foot taps (Figure 1B, experiment 1). In the second experiment, participants  
12 performed leftward and rightward saccades (Figure 1C, experiment 2), and in the third  
13 experiment they performed alternating index and middle finger taps (Figure 1D, experiment  
14 3). All tasks caused significant motor slowing of about 20% over a period of 30 s (foot: 13.9  
15 +/- 2.7% cohen's d = 1.88; eyes: 18.3 +/- 2.8%, cohen's d = 3.35; finger: 21.6 +/- 6.4% cohen's  
16 d = 2.48, all values mean +/- sem; linear mixed-effects model (LMEM) summarized results for  
17 experiments 1-3;  $F(2,11) \geq 21.813$ ,  $p \leq 0.001$ , Figure 1B-D.).

18 Interestingly, we observed virtually no accumulation of motor slowing over the course of the  
19 experiment, i.e. the initial tapping speed measured during the first 10 s of each trial was largely  
20 unchanged (see Table 1; *time effect*:  $p \geq 0.134$ ;). This suggests that the process causing  
21 motor slowing is able to spontaneously recover during the subsequent 30 s break. Importantly,  
22 in experiment 3 we also modulated the break length (i.e. 5 s, 10 s, 15 s, 20 s, 25 s, 30 s break,  
23 randomized within participants; see method section for details) after both the slowing and the  
24 control conditions (experiment 3), which allowed us to further investigate the time course of  
25 recovery. We found that the break length significantly influenced subsequent tapping speed  
26 (*break length*  $\times$  *time* interaction,  $F(10,272) = 2.329$ ,  $p = 0.012$ , Figure 2B): After long breaks,

1 initial tapping speed was high and, subsequently, strongly diminished when tapping was  
2 performed for 30 s. By contrast, after short breaks, the initial tapping speed was clearly  
3 reduced but further tapping speed reductions were less pronounced. This demonstrates that  
4 break length had a strong influence on the initial tapping speed (0-10 s), but not the final  
5 tapping speed (20-30 s). Next, we tested whether shorter breaks allowed for less recovery as  
6 reflected by slower tapping speed at the start of the next trial. We calculated a recovery index  
7 by subtracting the movement speed before a break from the movement speed immediately  
8 after the break (higher index indicates more recovery of tapping speed) for both the slowing  
9 and control conditions. We found a significant *condition*  $\times$  *break length* interaction (LMEM,  
10  $F(5,16)=8.771$ ,  $p<0.001$ , Figure 2D) indicating that longer breaks lead to more recovery than  
11 shorter breaks. Interestingly, participants' tapping performance seemed to slightly deteriorate  
12 during short breaks after control trials. Note that this effect was not driven by the final tapping  
13 speed, as there was no significant difference in tapping speed before the break (Figure 2C).  
14 Finally, there was a significant correlation between the average amount of slowing observed  
15 for an individual participant and the slope of recovery during the break ( $n=17$ , Pearson  
16  $r=0.7543$ ,  $p<0.001$ , Figure 2E). In summary, our behavioural results show that motor slowing  
17 occurs during prolonged tapping irrespective of which effector or tapping task is performed.  
18 However, the mechanism which causes slowing appears to fully recover during the  
19 subsequent 25-30 s break following an approximately linear time course.

20

### 21 ***Decreased movement speed leads to increased fMRI activation***

22 The same paradigm was performed while fMRI was used to localize which brain areas might  
23 be specifically involved in motor slowing (new cohort with  $n=25$ , experiment 4). The fMRI  
24 experiment included slowing conditions, control conditions, recovery periods and true rest  
25 periods (i.e. periods where participants rested after they had fully recovered, see methods for  
26 further details; Figure 3A). In the MR scanner, the participants exhibited significant motor

1 slowing (Figure 3C) with a similar effect size to that observed during the behavioural  
2 experiment above ( $F(2,48)=85.557$ ,  $p<0.001$ , Cohen's  $d = 1.98$ ). Tapping with the right  
3 (dominant) hand activated a typical sensorimotor network (Figure 3B, purple; Supplemental  
4 Table S1), including left primary sensorimotor cortex (SM1), bilateral dorsal premotor cortex  
5 (PMd), bilateral supplementary motor area (SMA), right cerebellum lobule HVI (Cb), left  
6 posterior putamen (Put), left ventrolateral thalamus (Tha), and bilateral secondary  
7 somatosensory cortex (S2). To identify areas specifically related to motor slowing, we  
8 modelled slowing as a linearly increasing parametric modulator of the tapping condition  
9 (Büchel et al., 1998). We found that all motor areas showed a trend towards an activation  
10 increase even though tapping speed decreased due to motor slowing. However, this effect  
11 only reached significance for voxels in contralateral SM1, PMd and SMA (Figure 3B, blue;  
12 Figure 3D,E). We also investigated the 30 s recovery periods following either the 30 s slowing  
13 condition or the 10 s control condition. To that end, we modelled recovery as a linear increase  
14 during the breaks after the slowing condition, but not after the control condition. We found a  
15 significant effect of recovery for voxels in SM1, PMd, SMA ( $p_{FWE} < 0.05$ ; Figure 3B,D,E  
16 green). Additionally, we found increased activation in the ipsilateral cerebellar motor lobules  
17 (HVI) and contralateral S2 associated with recovery during the break. All of these areas  
18 showed decreasing activity over the course of recovery which was significantly larger after the  
19 slowing condition than after the control condition. Note that performing additional analyses  
20 using a block design (i.e. 10 s blocks within each condition) yielded similar results (Figure  
21 2D,E).

22 Thus, somewhat counterintuitively, our fMRI analyses revealed that a reduction in tapping  
23 speed during the slowing condition was associated with (i) an activation increase in the motor  
24 network which (ii) gradually normalized during the subsequent recovery period.

25

## 1 **Motor Slowing leads to electrophysiological after-effects in the alpha-band**

2 It is well-known that the BOLD signal has poor temporal resolution and, thus, we cannot  
3 exclude that the effects observed during the recovery period were driven by inaccuracies in  
4 modelling the individual hemodynamic response function (Balsters and Ramnani, 2011;  
5 Handwerker et al., 2012). Therefore, we performed a separate experiment (n=17, experiment  
6 5) where we measured high-density EEG during the recovery period following either the  
7 slowing condition (30 s tapping) or the control condition (10s tapping; Figure 4A). Again we  
8 found a significant behavioural effect of motor slowing (Figure 4C,  $F(2,36)=14.796$ ,  $p<0.001$ ,  
9 cohen's  $d = 1.04$ ). The EEG analysis focused on neuronal oscillations in the alpha (8-14Hz),  
10 beta (14-30Hz) and gamma (30-40Hz) band, i.e. cortical rhythms which have been associated  
11 with motor control (Cheyne and Cheyne, 2013; Pfurtscheller, 1992; Pogosyan et al., 2009;  
12 Ritter et al., 2009). We first performed source localization using eLORETA (Pascual-Marqui  
13 et al., 2011) and extracted the power envelopes from three seed regions in SMA (MNI -6 -8  
14 50), left PMd (MNI -28 -16 70) and left SM1 (MNI -34 -20 55), i.e. those areas that were  
15 identified by the fMRI experiment and exhibited a significant activation increase for decreasing  
16 tapping speed (Figure 4B). For SM1 (but not PMd and SMA) we found that event-related  
17 power synchronization in the alpha band (Pfurtscheller et al., 1996) was more strongly  
18 decreased immediately after the slowing condition than after the control condition (Figure 4D,  
19 green vs. red). To further quantify this differential recovery process, we averaged alpha-power  
20 within three time bins of 10 s each after the break (Figure 4E) and performed a linear mixed  
21 effects analysis with the factors condition (slowing vs. control), time (during break, i.e. the 3  
22 bins), and trial (to check for changes in alpha over the whole experiment). We found a  
23 significant *condition x time* interaction ( $F(2,1136)=3.195$ ,  $p=0.041$ ) for left SM1. Post-hoc  
24 comparisons revealed that alpha-power was significantly lower during the first two time bins  
25 (0-10 s and 10-20 s) of the recovery period after the slowing condition than after the control  
26 condition ( $p_{\text{uncorr}}<0.05$ ), confirming that alpha power recovered more quickly after the control



1 condition than after the slowing condition. No such differences in the time course of recovery  
2 were observed for the beta or gamma band. This finding is interesting because it provides the  
3 first experimental evidence that recovery from motor slowing in SM1 can be detected with  
4 neurophysiological measurements applied when the participant is at rest. Note that, unlike  
5 fMRI, EEG offers a high temporal resolution which allowed us to accurately dissociate the  
6 tapping conditions from the subsequent break periods where no overt motor activity was  
7 observed. Our EEG results are consistent with the fMRI findings (see above) since it has been  
8 shown that low alpha power within the sensorimotor system is associated with an elevated  
9 BOLD signal (Bächinger et al., 2017; Hipp et al., 2012; Ritter et al., 2009). In line with these  
10 findings, it has been proposed that activity in the alpha band reflects top-down inhibitory  
11 control processes (Klimesch et al., 2007) suggesting that low alpha power - as observed in  
12 SM1 immediately after the slowing condition - reflects a prominent release of inhibition which  
13 gradually recovered over the time course of the break. While alpha power was also  
14 suppressed immediately after the control tapping condition, it recovered much quicker. Thus,  
15 our EEG experiments corroborate the fMRI results by suggesting that (i) after-effects of motor  
16 slowing can be measured during the first 10 s of the recovery period and (ii) recovery from  
17 motor slowing is associated with re-establishing inhibitory activity in SM1.

18

### 19 ***Motor Slowing is associated with a release of inhibition in SM1***

20 Whilst the alpha-band has been associated with inhibitory control, EEG can only reveal  
21 indirect insights into the activity of inhibitory circuits in SM1. We therefore performed a follow-  
22 up experiment (n=13, experiment 7) and directly probed the activity of GABA<sub>A</sub> circuits by  
23 applying a TMS short-interval intracortical inhibition (SICI) protocol during the breaks following  
24 either the slowing condition (30 s tapping of an over-learned 4-element sequence) or the  
25 control condition (10 s of the same tapping task; Figure 5A) (Kujirai et al., 1993; Ziemann et  
26 al., 1996). Again there was a significant decrease of the movement speed during the slowing

1 condition ( $F(3,36)=42.94$ ,  $p<0.001$ , cohen's  $d = 2.40$ ; Figure 5B). In this experiment, we  
2 measured the effect of slowing versus the control condition on two separate days to limit the  
3 over-all duration of each experimental session. We performed several control analyses to  
4 ensure that both the behavioural and the electrophysiological measurements were  
5 comparable between the sessions. First, tapping speed for the first 10 s bin was similar and  
6 not significantly different between sessions (paired t-test:  $t(12)=1.303$ ,  $p=0.217$ ). Second, for  
7 both sessions, rest motor threshold (RMT), conditioning stimulus intensity (CS) and test  
8 stimulus intensity (TS) were similar and not significantly different (see Supplemental Table  
9 S2). Finally, SICI measured at rest prior to the tapping conditions (Pre measurements) was  
10 similar and not significantly different between the sessions (Figure 5C, *Slowing vs. Control at*  
11 *Pre*:  $F(1,12)= 0.086$ ,  $p=0.775$ ). Comparison of SICI before (Pre) and after (Post) the  
12 behavioural paradigm revealed only a minimal decrease in inhibition over the course of the  
13 experiment, which was highly similar between sessions (Figure 4B, *Time (Pre vs Post)*:  
14  $F(1,12)=1.950$ ,  $p=0.188$ , *Time (Pre, Post) x Condition* interaction:  $F(1,12)=0.214$ ,  $p=0.652$ ).  
15 Importantly, we found that recovery of SICI during the break followed different time courses  
16 when measured after the slowing versus the control condition (Figure 5C), which was  
17 statistically confirmed by a significant *condition x time* interaction ( $F(4,12)=5.573$ ,  $p=0.009$ ).  
18 More specifically, SICI was strongly decreased immediately after the motor slowing condition  
19 (0-10 s of recovery period) as compared to both the Pre and Post measurements. However,  
20 it returned back to baseline at the end of the recovery period (20-30 s) (Figure 5C, green bars).  
21 By contrast, after the control condition, SICI was only slightly decreased and recovered almost  
22 immediately after tapping (Figure 5C, red bars).  
23 Thus, in line with the fMRI and EEG findings reported above, the TMS experiment revealed  
24 further evidence that performing repetitive movements for a period of  $\geq 30$  s leads to a strong  
25 release of inhibition within SM1 that gradually normalized over time.

26

1 ***Motor slowing is associated with decreased surround inhibition and increased***  
2 ***coactivation of antagonistic muscles***

3 How can this release of intracortical inhibition be reconciled with the observation that repetitive  
4 movements become slower? Repetitive movements in general rely on precise timing between  
5 agonistic and antagonistic muscle activity: whenever the agonistic movement is performed,  
6 corresponding antagonistic motor activity needs to be suppressed and vice-versa.  
7 Accordingly, the observed increase in excitability in the motor system might be “maladaptive”  
8 and we hypothesized that it might indicate a breakdown of surround inhibition. Surround  
9 inhibition in the motor system describes the phenomenon that selective preparation of, e.g.,  
10 an index finger movement, decreases excitability of surrounding fingers (Beck and Hallett,  
11 2011). Applied to motor slowing, one would expect that surround inhibition of antagonistic  
12 movements should be more strongly diminished after slowing than after the control condition  
13 and this effect should be observable in form of (i) a gradual increase of coactivation during the  
14 slowing condition; and (ii) reduced surround inhibition when measured immediately after the  
15 slowing condition (i.e. during the first 10 s of the recovery period) with TMS. To test these  
16 predictions, we performed a final experiment (n=19, experiment 7) where participants  
17 performed repetitive thumb movements for either 30 s (slowing condition) or 10 s (control  
18 condition; Figure 6A). Again, we found significant motor slowing ( $F(2,36)=21.484$ ,  $p<0.001$ ,  
19  $\text{cohen's } d = 1.15$ ). Electromyography (EMG) was measured from the thumb flexor opponens  
20 pollicis (OP) and its antagonist, i.e. the extensor pollicis longus (EPL) during movement and  
21 rest. Muscle coactivations were assessed by calculating the overlap between the rectified OP  
22 and EPL EMG signals (Figure 6B). We found a significant increase in coactivation over the  
23 course of tapping (Figure 6C,  $F(2,36)=9.915$ ,  $p=0.001$ ), and over the course of motor slowing,  
24 changes in coactivation in a single participant was directly related to his/her changes in  
25 movement speed (LMEM,  $F(1,1561.414) = 4.243$ ,  $p=0.040$ ). We did not find such an  
26 association for any other EMG parameter (i.e. amplitude, frequency of individual muscles).

1 Additionally, we quantified surround inhibition during the recovery phase immediately after the  
2 slowing versus control condition. These measurements took place during two separate  
3 sessions where participants were instructed to perform a thumb abduction which elicited an  
4 EMG-triggered TMS pulse. TMS was either triggered immediately (i.e. 3 ms after movement  
5 onset TMS<sub>Mov</sub>) or 2 s after movement onset (TMS<sub>Con</sub>). The quotient of the motor evoked  
6 potentials elicited by the two pulses served as a measure for surround inhibition (see methods  
7 for details). Again, we made sure that the surround inhibition measurements were comparable  
8 across sessions. First, tapping speed during the first 10 s bin was comparable between  
9 sessions and not significantly different (paired t-test  $t(18) = 1.381$ ,  $p=0.184$ ). Second, rest  
10 motor threshold was similar across sessions and the size of TMS<sub>Con</sub> did not change between  
11 the two sessions or within the different timepoints of the break (see Supplemental Table S3).  
12 To compare the results between the two sessions we normalized surround inhibition  
13 measurements obtained during the break to the individual Pre measurements. Normalized  
14 surround inhibition measured during the first 10 s of the recovery phase was significantly  
15 decreased for the slowing condition compared to the control condition, but reached similar  
16 levels at the end of the break (significant *condition x time* interaction (Figure 6E;  $F(2,18) =$   
17  $3.908$ ,  $p=0.039$ )). Further, across participants, the average amount of coactivation in the last  
18 10 s of slowing trials was predictive of the average amount of surround inhibition measured  
19 early during the recovery period such that individuals with a high co-contraction index exhibit  
20 a strong release of surround inhibition (Figure 6F; linear regression model;  $R^2=0.228$ ,  
21  $p=0.039$ ). Taken together, these results suggest that the amount of motor slowing, the amount  
22 of coactivation between the agonistic and antagonistic muscle, and the strong release of  
23 surround inhibition are associated. We therefore propose that fast repetitive movements cause  
24 an increase of the excitation-inhibition ratio at the level of M1 which results, at least partly,  
25 from a breakdown of surround inhibition. Accordingly, coactivation of agonistic and

1 antagonistic muscles increases, which ultimately leads to a decrease in movement speed as  
2 observed during motor slowing.

3

#### 4 **Discussion**

5 We demonstrate that fast repetitive movements are subject to a gradual reduction of  
6 movement speed or “motor slowing”, even when the required forces are clearly submaximal  
7 and each single contraction is brief. The motor slowing phenomenon was replicated across  
8 seven different cohorts (consisting of 122 participants in total) and statistics consistently  
9 revealed large effect sizes (all cohen’s  $d > 1.04$ ) irrespective of whether movements were  
10 performed with fingers, feet or eyes or whether the motor task was simple (e.g. single joint  
11 movements) or more complicated (e.g. overtrained four-element sequence). Moreover, motor  
12 slowing recovered quickly during the subsequent break with a linear relationship between the  
13 rate of slowing and the rate of recovery (Figure 2). The latter finding is particularly important  
14 since it suggests that circuits which mediate slowing might exhibit measurable after-effects  
15 during the subsequent break. This offers a unique opportunity to disambiguate the  
16 mechanisms of motor slowing from neural activity related to movement execution per se. In  
17 summary, in line with previous work on fatigability of repetitive movements (Arias et al., 2015;  
18 Madrid et al., 2016; Rodrigues et al., 2009; Teo et al., 2014, 2012b), our findings suggest that  
19 motor slowing is a robust phenomenon which reflects a general organisational principle of the  
20 motor system (Viviani and Cenzato, 1985).

21 Considering that motor slowing is such a prominent phenomenon, it is surprising how little is  
22 known about the underlying mechanism. Previous research strongly suggests that supraspinal  
23 mechanisms play an important role, since there is no change in isometric maximal voluntary  
24 contraction (MVC) force, as well as no change in force production related to electrical  
25 stimulation of the muscle (Arias et al., 2015; Madrid et al., 2018; Miller et al., 1993; Rodrigues

1 et al., 2009). Here we extend current knowledge by specifically showing that a breakdown of  
2 surround inhibition contributes to performance fatigability as quantified by the motor slowing  
3 phenomenon.

4

5 ***Motor slowing is associated with increased neural activity within the motor network***  
6 ***and, particularly, motor cortex***

7 Our fMRI results revealed a general increase in neural activity within the general cortico-  
8 subcortical motor network, with the largest effects observed in PMd, SMA and SM1. No  
9 evidence was found suggesting that any motor or non-motor area reduced its activity. This  
10 finding is in line with previous work demonstrating increasing activity in SM1, PMd, SMA during  
11 fatiguing maximal isometric contractions, as characterized by a progressive decline in maximal  
12 finger abduction force (Post et al., 2009b). Although fatigability of isometric contractions  
13 arises mainly at the level of the muscle, there is also a central contribution. This has been  
14 shown by the ‘superimposed twitch’ method, i.e. applying electrical stimulation which evokes  
15 an increment in force (Gandevia et al., 1996; Schillings et al., 2003). During fatiguing  
16 contractions, the amplitude of the superimposed twitch increases gradually suggesting that,  
17 despite the observed increase in the BOLD signal of cortical motor areas, the central drive is  
18 insufficient to maintain truly maximal contractions (Post et al., 2009b). We observed the same  
19 pattern of results for a repetitive task where muscular or spinal fatigue mechanism play a minor  
20 role (Rodrigues et al., 2009), confirming that – even though paradoxical at first sight - an  
21 increase of net activity within cortical motor areas might underpin a central mechanism  
22 mediating performance fatigability.

23 Our fMRI study was designed to disambiguate changes in BOLD response related to the  
24 recovery from motor slowing (i.e. immediately after tapping) from true rest periods which were  
25 acquired after recovery was completed (i.e. >30 s after tapping, as suggested by Fig. 1).  
26 Interestingly, for various motor areas we observed that the BOLD response remained elevated

1 during the first 10 s after the motor slowing condition. By contrast, the BOLD signal returned  
2 much more rapidly to baseline after the control condition. Interestingly, only areas which  
3 tended to exhibit an increase in BOLD response during long-lasting tapping gradually reduced  
4 their activity during the subsequent break, while no other brain area exhibited a significant  
5 change in activation during the break. Note that the overall activation changes of the motor-  
6 network under FWE-correction was smaller during tapping than during the break. This higher  
7 sensitivity of the fMRI data during the break might result from less inter-subject variability at  
8 rest. In addition to our behavioural finding that shortening the break, i.e. disrupting the recovery  
9 process after slowing by another block of tapping, has clear behavioural consequences for  
10 subsequent tapping trials, our fMRI data suggests that the after-effects of slowing are  
11 mediated by the same neural substrate as motor slowing itself.

12 One general concern regarding fMRI is its low temporal resolution, and the after-effects  
13 observed during the first 10 s following the motor slowing condition might simply reflect a  
14 methodological artefact due to an inaccurate model of the hemodynamic response function.  
15 Therefore, we investigated the after-effects of motor slowing versus (non-slowng) control  
16 tapping with EEG, which offers limited spatial but excellent temporal resolution. Our EEG data  
17 confirmed differential temporal dynamics of alpha-band activity in SM1 during the break, which  
18 took longer to recover immediately after the motor slowing condition than after the control  
19 condition (Figure 4). In summary, our results are in line with the concept that motor slowing is  
20 a form of central fatigability which can be robustly measured in cortical motor areas and,  
21 particularly M1, where it outlasts the movement execution phase, a phenomenon that has  
22 been previously demonstrated for isometric force production tasks (Taylor and Gandevia,  
23 2008).

24

25

1 ***Motor slowing is associated with the release of surround inhibition of primary motor***  
2 ***cortex***

3 Central fatigability has been conceptualized as a decrease in voluntary drive, resulting in  
4 descending motor commands that are insufficient to maintain high tapping speed or high  
5 isometric muscle contractions (Gandevia et al., 1996; Kluger et al., 2013). Yet, we and others  
6 (Post et al., 2009a) revealed that central fatigability is associated with an increase of neural  
7 activity as measured with fMRI. How can these paradoxical findings be reconciled? Both EEG  
8 (Figure 4) and SICl results (Figure 5) suggest a decrease of inhibition within M1 shortly after  
9 motor slowing. More specifically, EEG measurements revealed that alpha was strongly reduced  
10 immediately after tapping, and recovered significantly slower in the first 20 s after motor  
11 slowing compared to the control condition. High alpha-activity has been suggested to reflect  
12 inhibitory activity (Klimesch et al., 2007), thereby providing indirect evidence that motor  
13 slowing is associated with a pronounced release of SM1 inhibition, which is gradually restored  
14 during the subsequent break. These EEG results were further supported by SICl  
15 measurements that assess the activity of GABA<sub>A</sub>-ergic networks within M1 (Werhahn et al.,  
16 1999). We found a reduction in SICl indicating the release of inhibition in M1, which was most  
17 pronounced during the first 10 s after the slowing condition (i.e. for the first SICl pulse) but  
18 was gradually restored during the 30 s break (Figure 4). Under the assumption that these  
19 after-effects of reduced inhibition are representative of neurophysiological changes  
20 underpinning the motor slowing phenomenon during movement execution, the increase in  
21 BOLD signal is likely to reflect higher net excitation of the motor network (Waldvogel et al.,  
22 2000), resulting from a shift of the excitation-inhibition balance towards excitation (Logothetis,  
23 2008). But how could an increase of the excitation-inhibition ratio within M1 cause decrements  
24 in tapping performance? Repetitive single joint movements require the sequential activity of  
25 agonistic and antagonistic muscles. This alternating activation pattern needs to be particularly  
26 well-timed for fast, repetitive movements requiring that the agonist is excited while the



1 antagonist is inhibited to minimize muscular coactivation. Furthermore, it has been shown that  
2 the ability to selectively activate one specific muscle while suppressing unwanted activity in  
3 other muscles requires surround inhibition (Beck and Hallett, 2011). Here we demonstrate that  
4 motor slowing is associated with a gradual increase of coactivation between antagonistic  
5 muscles, and that this change of coactivation predicts the amount of motor slowing observed  
6 across participants. We further found that surround inhibition was decreased immediately after  
7 tapping, which was significantly stronger following the motor slowing condition than the control  
8 condition and gradually recovered during the break. Importantly, individuals which exhibited  
9 strong coactivation during the last 10 s of the motor slowing condition also exhibited low  
10 surround inhibition during the first 10 s of the subsequent break, as indicated by a significant  
11 association between these phenomena. These observations strongly suggest that motor  
12 slowing is at least partially caused by a breakdown of surround inhibition which, in turn, causes  
13 an increase of coactivation between antagonistic muscle groups, thereby making repetitive  
14 movements increasingly effortful and slow. Even though we tested healthy participants, it is  
15 possible that motor slowing shares mechanistic similarities with pathological forms of fatigue  
16 that are frequently observed in neurological patients (Lewis and Wessely, 1992; Lou, 2009;  
17 Ranjith, 2005; Watanabe et al., 2008). Our study provides the testable hypothesis that an  
18 abnormal release of inhibition within SM1 might be related to pathological fatigability and/or  
19 bradykinetic movements.

20

### 21 ***Potential neuronal basis of motor slowing at the microscopic level***

22 One open question is how our findings - which were all obtained at the macroscopic level -  
23 relate to activity at the cell level. It is well known that neurons in primary motor cortex are  
24 tuned to represent movement direction in extrinsic space (Georgopoulos and Carpenter,  
25 2015; Georgopoulos et al., 1982, 1986) and that this tuning is sculpted by inhibitory  
26 mechanisms (Merchant et al., 2008). In particular, it has been proposed that circuits mediating

1 local inhibition lead to a sharpening of the directional tuning curve, which determines the  
2 accuracy of the directional motor command (Mahan and Georgopoulos, 2013). Although this  
3 theory was first discussed with respect to the speed-accuracy trade-off of single movements,  
4 a similar mechanism might play an important role during motor slowing. Here we propose a  
5 model of simple flexor-extensor movements similar to Experiment 7 (Fig. 6), which contains  
6 two populations of pyramidal cells ( $P_{\text{Flex}}$  &  $P_{\text{Ext}}$ ; Figure 7) that are tuned in opposite directions.  
7 Inhibitory interneurons shape the width of each tuning curve ( $I$ ; Figure 7). Additionally, the two  
8 populations mutually inhibit each other reflecting the mechanism of surround inhibition. At the  
9 beginning of tapping, inhibition is strong and the two tuning curves are “sharp”. However, when  
10 the fast tapping needs to be maintained over a longer period of time, surround inhibition breaks  
11 down and the tuning curves of both populations become broader (Figure 7; right side). In turn,  
12 the descending motor command is less accurate making the muscle activation pattern less  
13 efficient activating antagonistic muscle groups in parallel. Note that although Figure 7 shows  
14 a direct interaction between the two populations, the broadening of tuning curves might also  
15 occur due to a general release of inhibition, which might be controlled by an upstream area,  
16 for example, via afferents from premotor cortex or SMA. This model might also explain why  
17 brain activity increases during fatiguing isometric contractions (van Duinen et al., 2007).  
18 Potentially, in the isometric case, the development of a specific force level requires a precisely  
19 tuned population of neurons to maintain synergistic control of the muscles involved in the  
20 movement.

21 In summary, our model suggests that a release of inhibition and, particularly, a breakdown of  
22 surround inhibition in M1 might be the cause of performance fatigability rather than a  
23 compensatory mechanism to overcome the reduction in muscular output. In line with this  
24 proposal, it has been shown that isometric contractions can be maintained longer when an  
25 external focus of attention is adopted (Kuhn et al., 2017a). Interestingly, this improvement of

1 performance was accompanied by an increase in SICI (Kuhn et al., 2017a, 2017b) and an  
2 increase in surround inhibition (Kuhn et al., 2018) .

3

#### 4 **Conclusion**

5 Here we show that fast repetitive movements are subject to gradual slowing even though each  
6 single muscle contraction is brief and submaximal. Based on converging evidence from  
7 behavioural, fMRI, EEG and TMS measurements we argue that motor slowing arises from  
8 transient neurophysiological changes of supraspinal areas indicating that this form of motor  
9 fatigability is largely mediated by central mechanisms. Specifically, we show that motor  
10 slowing is accompanied by a gradual shift of the excitation-inhibition balance within primary  
11 motor cortex towards more net excitation. Even though paradoxical at first, we show that this  
12 shift results from the release of inhibition in M1 and, particularly, the breakdown of surround  
13 inhibition causing increased co-contraction between antagonistic muscle groups which, in  
14 turn, leads to more and more effortful and slow tapping movements. We further propose a  
15 model that this breakdown of surround inhibition causes a broader tuning of neuronal  
16 populations in M1 that encode movement direction, resulting in a sub-optimal and less efficient  
17 descending motor command than at the beginning of the tapping. Given that motor slowing is  
18 not only generalizable across muscle groups and tasks, but is also present in almost all  
19 participants, it reflects a fundamental control principle of the brain suggesting that inhibitory  
20 control is essential for high motor efficiency and that a breakdown of inhibition results in more  
21 and more effortful movements. We investigated healthy young adults, however, our study  
22 provides the testable hypothesis that an abnormal release of inhibition within M1 might  
23 contribute to pathological fatigability and/or bradykinetic movements.

24

25

## 1 **Acknowledgements**

2 The authors would like to thank Xue Zhang, Marta Stepien, Marionna Munger and David  
3 Tanner for data collection during the behavioural and/or TMS experiments, Dan Woolley for  
4 proof-reading the manuscript and technical assistance while performing the experiments,  
5 Charles Lambelet for building a supportive device for the surround inhibition experiment,  
6 Dante Mantini for providing code for source localisation of the EEG data and Sarah Meissner  
7 for critical comments on the manuscript. This work was supported by the Swiss National  
8 Science Foundation (SNSF 320030\_175616) and the Singapore-ETH Centre.

## 9 **Author Contributions**

10 M.B., R.L., F.T., J.B., N.W. designed the experiments, M.B., R.L., F.T., S.H. collected the data.  
11 M.B., R.L., F.T., S.H. analysed the data. M.B., R.L., J.B. & N.W. wrote the manuscript.

12

## 13 **Declaration of Interests**

14 The authors declare no conflict of interests.

15

## 16 **References**

17 Aoki, T., Francis, P.R., and Kinoshita, H. (2003). Differences in the abilities of individual fingers  
18 during the performance of fast, repetitive tapping movements. *Exp. Brain Res.* 152, 270–280.  
19 Arias, P., V, R.-G., Y, C.-B., Madrid, A., Espinosa, N., J, V.-S., Grieve, K.L., a Oliviero, and  
20 Cudeiro, J. (2015). Central fatigue induced by short-lasting finger tapping and isometric tasks:  
21 A study of silent periods evoked at spinal and supraspinal levels. *Neuroscience* 305, 316–327.  
22 Bachinger, M., Zerbi, V., Moisa, M., Polania, R., Liu, Q., Mantini, D., Ruff, C., and Wenderoth,  
23 N. (2017). Concurrent tACS-fMRI reveals causal influence of power synchronized neural  
24 activity on resting state fMRI connectivity. *J. Neurosci.* 37.  
25 Balsters, J.H., and Ramnani, N. (2011). Cerebellar plasticity and the automation of first-order

- 1 rules. *J. Neurosci.* *31*, 2305–2312.
- 2 Beck, S., and Hallett, M. (2011). Surround inhibition in the motor system. *Exp. Brain Res.* *210*,
- 3 165–172.
- 4 Brawn, T.P., Fenn, K.M., Nusbaum, H.C., and Margoliash, D. (2010). Consolidating the effects
- 5 of waking and sleep on motor-sequence learning. *J. Neurosci.* *30*, 13977–13982.
- 6 Büchel, C., Holmes, A.P., Rees, G., and Friston, K.J. (1998). Characterizing Stimulus–
- 7 Response Functions Using Nonlinear Regressors in Parametric fMRI Experiments.
- 8 *Neuroimage* *8*, 140–148.
- 9 Cheyne, D., and Cheyne, D.O. (2013). MEG studies of sensorimotor rhythms: A review. *Exp.*
- 10 *Neurol.* *245*, 27–39.
- 11 Delorme, A., and Makeig, S. (2004). EEGLAB: an open source toolbox for analysis of single-
- 12 trial EEG dynamics including independent component analysis. *J. Neurosci. Methods* *134*, 9–
- 13 21.
- 14 Dolan, P., and Adams, M.A. (1998). Repetitive lifting tasks fatigue the back muscles and
- 15 increase the bending moment acting on the lumbar spine. *J. Biomech.* *31*, 713–721.
- 16 van Duinen, H., Renken, R., Maurits, N., and Zijdwind, I. (2007). Effects of motor fatigue on
- 17 human brain activity, an fMRI study. *Neuroimage* *35*, 1438–1449.
- 18 Eickhoff, S.B., Stephan, K.E., Mohlberg, H., Grefkes, C., Fink, G.R., Amunts, K., and Zilles,
- 19 K. (2005). A new SPM toolbox for combining probabilistic cytoarchitectonic maps and
- 20 functional imaging data. *Neuroimage* *25*, 1325–1335.
- 21 Frost, G., Dowling, J., Dyson, K., of, and O, B.-O.- (1997). Cocontraction in three age groups
- 22 of children during treadmill locomotion. *J. Electromyogr. And~....*
- 23 Gandevia, S.C., Allen, G.M., Butler, J.E., and Taylor, J.L. (1996). Supraspinal factors in human
- 24 muscle fatigue: evidence for suboptimal output from the motor cortex. *J. Physiol.* *490*, 529–
- 25 536.
- 26 Georgopoulos, A.P., and Carpenter, A.F. (2015). Coding of movements in the motor cortex.

- 1 Curr. Opin. Neurobiol. 33, 34–39.
- 2 Georgopoulos, A.P., Kalaska, J.F., Caminiti, R., and Massey, J.T. (1982). On the relations  
3 between the direction of two-dimensional arm movements and cell discharge in primate motor  
4 cortex. *J. Neurosci.* 2, 1527–1537.
- 5 Georgopoulos, A.P., Schwartz, A.B., and Kettner, R.E. (1986). Neuronal population coding of  
6 movement direction. *Science* 233, 1416–1419.
- 7 Handwerker, D.A., Gonzalez-Castillo, J., D’Esposito, M., and Bandettini, P.A. (2012). The  
8 continuing challenge of understanding and modeling hemodynamic variation in fMRI.  
9 *Neuroimage* 62, 1017–1023.
- 10 Haueisen, J., Ramon, C., Eiselt, M., Brauer, H., and Nowak, H. (1997). Influence of tissue  
11 resistivities on neuromagnetic fields and electric potentials studied with a finite element model  
12 of the head. *{IEEE} Trans. Biomed. Eng.* 44, 727–735.
- 13 Hipp, J.F., Hawellek, D.J., Corbetta, M., Siegel, M., and Engel, A.K. (2012). Large-scale  
14 cortical correlation structure of spontaneous oscillatory activity. *Nat. Neurosci.* 15, 884–890.
- 15 Iacono, M., Neufeld, E., Akinngbe, E., Bower, K., Wolf, J., Oikonomidis, I., Sharma, D., Lloyd,  
16 B., Wilm, B.J., Wyss, M., et al. (2015). MIDA: A Multimodal Imaging-Based Detailed  
17 Anatomical Model of the Human Head and Neck. *PLoS One* 10, e0124126.
- 18 Klimesch, W., Sauseng, P., and Hanslmayr, S. (2007). EEG alpha oscillations: The inhibition–  
19 timing hypothesis. *Brain Res. Rev.* 53, 63–88.
- 20 Kluger, B.M., Krupp, L.B., and Enoka, R.M. (2013). Fatigue and fatigability in neurologic  
21 illnesses: proposal for a unified taxonomy. *Neurology* 80, 409–416.
- 22 Kuhn, Y.-A., Keller, M., Ruffieux, J., and Taube, W. (2017a). Adopting an external focus of  
23 attention alters intracortical inhibition within the primary motor cortex. *Acta Physiol.* 220, 289–  
24 299.
- 25 Kuhn, Y.-A., Keller, M., Ruffieux, J., and Taube, W. (2017b). Intracortical Inhibition Within the  
26 Primary Motor Cortex Can Be Modulated by Changing the Focus of Attention. *J. Vis. Exp.*

1 e55771.

2 Kuhn, Y.-A., Keller, M., Lauber, B., and Taube, W. (2018). Surround inhibition can instantly be  
3 modulated by changing the attentional focus. *Sci. Rep.* 8, 1085.

4 Kujirai, T., Caramia, M.D., Rothwell, J.C., Day, B.L., Thompson, P.D., Ferbert, A., Wroe, S.,  
5 Asselman, P., and Marsden, C.D. (1993). Corticocortical inhibition in human motor cortex. *J.*  
6 *Physiol.* 471, 501–519.

7 Lewis, G., and Wessely, S. (1992). The epidemiology of fatigue: more questions than answers.  
8 *J. Epidemiol. Community Health* 46, 92–97.

9 Liu, Q., Balsters, J.H., Baechinger, M., van der Groen, O., Wenderoth, N., and Mantini, D.  
10 (2015). Estimating a neutral reference for electroencephalographic recordings: the importance  
11 of using a high-density montage and a realistic head model. *J. Neural Eng.* 12, 56012.

12 Logothetis, N.K. (2008). What we can do and what we cannot do with fMRI. *Nature* 453, 869–  
13 878.

14 Lou, J.-S. (2009). Physical and Mental Fatigue in Parkinson’s Disease. *Drugs Aging* 26, 195–  
15 208.

16 Madrid, A., Josep, V.-S., Oliviero, A., Cudeiro, J., and Arias, P. (2016). Differential responses  
17 of spinal motoneurons to fatigue induced by short-lasting repetitive and isometric tasks.  
18 *Neuroscience* 339, 655–666.

19 Madrid, A., Madinabeitia-Mancebo, E., Cudeiro, J., and Arias, P. (2018). Effects of a Finger  
20 Tapping Fatiguing Task on M1-Intracortical Inhibition and Central Drive to the Muscle. *Sci.*  
21 *Rep.* 8, 9326.

22 Mahan, M.Y., and Georgopoulos, A.P. (2013). Motor directional tuning across brain areas:  
23 directional resonance and the role of inhibition for directional accuracy. *Front. Neural Circuits*  
24 7, 92.

25 Manjaly, Z.-M., Harrison, N.A., Critchley, H.D., Do, C.T., Stefanics, G., Wenderoth, N.,  
26 Lutterotti, A., Müller, A., and Stephan, K.E. (2019). Pathophysiological and cognitive

1 mechanisms of fatigue in multiple sclerosis. *J. Neurol. Neurosurg. Psychiatry* jnnp-2018-  
2 320050.

3 Mattay, V.S., Fera, F., Tessitore, A., Hariri, A.R., Das, S., Callicott, J.H., and Weinberger, D.R.  
4 (2002). Neurophysiological correlates of age-related changes in human motor function.  
5 *Neurology* 58, 630–635.

6 Merchant, H., Naselaris, T., and Georgopoulos, A.P. (2008). Dynamic Sculpting of Directional  
7 Tuning in the Primate Motor Cortex during Three-Dimensional Reaching. *J. Neurosci.* 28,  
8 9164–9172.

9 Miller, R.G., Moussavi, R.S., Green, A.T., Carson, P.J., and Weiner, M.W. (1993). The fatigue  
10 of rapid repetitive movements. *Neurology* 43, 755–761.

11 Pascual-Marqui, R., Lehmann, D., Koukkou, M., Kochi, K., Anderer, P., Saletu, B., Tanaka,  
12 H., Hirata, K., John, E.R., Prichep, L., et al. (2011). Assessing interactions in the brain with  
13 exact low-resolution electromagnetic tomography. *Philos. Trans. R. Soc. A Math. Phys. Eng.*  
14 *Sci.* 369, 3768–3784.

15 Pfurtscheller, G. (1992). Event-Related Synchronization (Ers) - an Electrophysiological  
16 Correlate of Cortical Areas at Rest. *Electroencephalogr. Clin. Neurophysiol.* 83, 62–69.

17 Pfurtscheller, G., Jr., S.A., and Neuper, C. (1996). Event-related synchronization (ERS) in the  
18 alpha band — an electrophysiological correlate of cortical idling: A review. *Int. J.*  
19 *Psychophysiol.* 24, 39–46.

20 Pogosyan, A., Gaynor, L.D., Eusebio, A., and Brown, P. (2009). Boosting cortical activity at  
21 Beta-band frequencies slows movement in humans. *Curr Biol* 19, 1637–1641.

22 Post, M., Steens, A., Renken, R., Maurits, N.M., and Zijdwind, I. (2009a). Voluntary activation  
23 and cortical activity during a sustained maximal contraction: An fMRI study. *Hum. Brain Mapp.*  
24 30, 1014–1027.

25 Post, M., Steens, A., Renken, R., Maurits, N.M., and Zijdwind, I. (2009b). Voluntary activation  
26 and cortical activity during a sustained maximal contraction: An fMRI study. *Hum. Brain Mapp.*



- 1 30, 1014–1027.
- 2 Ranjith, G. (2005). Epidemiology of chronic fatigue syndrome. *Occup. Med. (Chic. Ill)*. 55, 13–
- 3 19.
- 4 Ritter, P., Moosmann, M., and Villringer, A. (2009). Rolandic Alpha and Beta EEG Rhythm
- 5 Strengths Are Inversely Related to fMRI-BOLD Signal in Primary Somatosensory and Motor
- 6 Cortex. *Hum. Brain Mapp.* 30, 1168–1187.
- 7 Rodrigues, J.P., Mastaglia, F.L., and Thickbroom, G.W. (2009). Rapid slowing of maximal
- 8 finger movement rate: fatigue of central motor control? *Exp. Brain Res.* 196, 557–563.
- 9 Schillings, M.L., Hoefsloot, W., Stegeman, D.F., and Zwarts, M.J. (2003). Relative
- 10 contributions of central and peripheral factors to fatigue during a maximal sustained effort.
- 11 *Eur. J. Appl. Physiol.* 90, 562–568.
- 12 Smith, J.L., Martin, P.G., Gandevia, S.C., and Taylor, J.L. (2007). Sustained contraction at
- 13 very low forces produces prominent supraspinal fatigue in human elbow flexor muscles. *J.*
- 14 *Appl. Physiol.* 103, 560–568.
- 15 Sogaard, K., Gandevia, S.C., Todd, G., Petersen, N.T., and Taylor, J.L. (2006). The effect of
- 16 sustained low-intensity contractions on supraspinal fatigue in human elbow flexor muscles. *J.*
- 17 *Physiol.* 573, 511–523.
- 18 Sohn, Y., and Hallett, M. (2004). Surround inhibition in human motor system. *Exp. Brain Res.*
- 19 158, 397–404.
- 20 Taylor, J.L., and Gandevia, S.C. (2008). A comparison of central aspects of fatigue in
- 21 submaximal and maximal voluntary contractions. *J. Appl. Physiol.* 104, 542–550.
- 22 Teo, W.-P., Rodrigues, J.P., Mastaglia, F.L., and Thickbroom, G.W. (2014). Modulation of
- 23 corticomotor excitability after maximal or sustainable-rate repetitive finger movement is
- 24 impaired in Parkinson's disease and is reversed by levodopa. *Clin. Neurophysiol.* 125,
- 25 562–568.
- 26 Teo, W.P., Rodrigues, J.P., Mastaglia, F.L., and Thickbroom, G.W. (2012a). Changes in

1 corticomotor excitability and inhibition after exercise are influenced by hand dominance and  
2 motor demand. *Neuroscience* 210, 110–117.

3 Teo, W.P., Rodrigues, J.P., Mastaglia, F.L., and Thickbroom, G.W. (2012b). Post-exercise  
4 depression in corticomotor excitability after dynamic movement: a general property of fatiguing  
5 and non-fatiguing exercise. *Exp. Brain Res.* 216, 41–49.

6 Viviani, P., and Cenzato, M. (1985). Segmentation and coupling in complex movements. *J.*  
7 *Exp. Psychol. Hum. Percept. Perform.* 11, 828–845.

8 Waldvogel, D., van Gelderen, P., Muellbacher, W., Ziemann, U., Immisch, I., and Hallett, M.  
9 (2000). The relative metabolic demand of inhibition and excitation. *Nature* 406, 995–998.

10 Watanabe, N., Stewart, R., Jenkins, R., Bhugra, D.K., and Furukawa, T.A. (2008). The  
11 epidemiology of chronic fatigue, physical illness, and symptoms of common mental disorders:  
12 A cross-sectional survey from the second British National Survey of Psychiatric Morbidity. *J.*  
13 *Psychosom. Res.* 64, 357–362.

14 Werhahn, K.J., Kunesch, E., Noachtar, S., Benecke, R., and Classen, J. (1999). Differential  
15 effects on motorcortical inhibition induced by blockade of GABA uptake in humans. *J. Physiol.*  
16 517 ( Pt 2, 591–597.

17 Yordanova, J., Kolev, V., Hohnsbein, J., and Falkenstein, M. (2004). Sensorimotor slowing  
18 with ageing is mediated by a functional dysregulation of motor-generation processes:  
19 evidence from high-resolution event-related potentials. *Brain* 127, 351–362.

20 Zhang, X., Woolley, D.G., Swinnen, S.P., Feys, H., Meesen, R., and Wenderoth, N. (2014).  
21 Changes in corticomotor excitability and intracortical inhibition of the primary motor cortex  
22 forearm area induced by anodal tDCS. *{PLoS} {ONE}* 9, e101496.

23 Ziemann, U., Lönnecker, S., Steinhoff, B.J., and Paulus, W. (1996). The effect of lorazepam  
24 on the motor cortical excitability in man. *Exp. Brain Res.* 109, 127–135.

25

26

1  
2

### 3 **Methods**

#### 4 ***General behavioural paradigm and analysis***

5 In all experiments (1-7) we used two behavioural conditions: a slowing condition (e.g.  $\geq 30$  s  
6 of tapping) and a (non-slowng) control condition (e.g. 10 s of tapping, control condition). Each  
7 condition was followed by a break of at least 30 s (except for experiment 3 where the break  
8 length varied from 5-30 s to perturb recovery, see below). The individual experiments varied  
9 in terms of effectors involved (i.e. different repetitive finger sequences, foot or eye movements)  
10 and measurement methods (fMRI, EEG, TMS, EMG). For comparison across different effector  
11 types and tasks, we analysed the movement speed in number of cycles per bin of 10 s. A  
12 cycle was defined as the time from movement of the first effector through the whole movement  
13 sequence, back to the first effector. For each participant the average movement speed was  
14 calculated for the slowing and control condition, then the movement speed of the slowing  
15 condition was normalized to the control condition. Statistical analyses were performed using  
16 linear mixed effects models (LMEM) in SPSS 24 (IBM, New York, USA). Presence of motor  
17 slowing was defined as a significant decrease of movement speed from the first to the last bin  
18 of the normalized slowing condition (i.e. main effect of time).

19

#### 20 **Additional information for specific experiments**

##### 21 ***Experiment 1: Repetitive foot movements***

###### 22 *Participants*

23 12 healthy volunteers participated in this experiment (6 female, age 27.5 +/- 8.43 years, right  
24 handed). All were free of medication, had no history of neurological or psychiatric disease and  
25 were naïve to the purpose of the experiment. All experimental protocols were approved by the

1 research ethics committee of the canton of Zurich (KEK-ZH 2016-02064) and participants  
2 gave informed consent to the study.

3

#### 4 *Behavioural paradigm*

5 In this experiment, we assessed the presence of motor slowing during foot tapping. Therefore,  
6 we compared a slowing condition (30 s of repetitive alternating left-right foot tapping) to a  
7 control condition (10 s of the same tapping task performed in the slowing condition). The order  
8 of the experimental conditions was pseudo-randomized. After each tapping condition, there  
9 was a break of 40 s for recovery. Participants conducted 10 trials per condition. A custom-built  
10 tapping device was equipped with a force sensor (FSR Model 406, Interlink Electronics Inc.,  
11 California, USA) to record single taps. The foot tapping was characterised by lifting the heel  
12 from the tapping sensor, which was fixated on a ground plate. The forefoot was always in  
13 contact with the ground. The main muscles involved in this movement are M. gastrocnemius  
14 and M. soleus. We excluded competitive athletes (i.e. more than 10 h of training per week)  
15 from the study.

16

#### 17 *Data analysis*

18 We calculated the movement speed between each alternating foot tap and averaged this data  
19 within three 10 s bins. Presence of motor slowing was assessed at the group level by first  
20 normalising the motor slowing condition (30 s tapping) to the control condition (10 s tapping)  
21 and submitting this data to a LMEM including the fixed factor *time* (1st-3rd bin) and the random  
22 factor *participant*.

23

## 1 ***Experiment 2: Repetitive eye movements***

### 2 *Participants*

3 12 healthy volunteers participated in this experiment (10 female, age 28.8 +/- 10.31 years,  
4 right handed). All were free of medication, had no history of neurological or psychiatric disease  
5 and were naïve to the purpose of the experiment. All experimental protocols were approved  
6 by the research ethics committee of the canton of Zurich (KEK-ZH 2016-02064) and  
7 participants gave informed consent to the study.

8

### 9 *Behavioural paradigm*

10 In this experiment we assessed the presence of motor slowing during eye movements. We  
11 compared a slowing condition (30 s of repetitive eye movements) to a control condition (10 s  
12 of the same tapping task performed in the slowing condition). The order of the experimental  
13 conditions was pseudo-randomized. After each condition, there was a break of 40 s for  
14 recovery. During rest, participants were allowed to close their eyes for relaxation and wetting.  
15 An auditory preparation cue indicated the start of a new trial. Participants conducted 10 trials  
16 per condition. The experimental set-up consisted of an eye-tracker with the corresponding  
17 monitor (Tobii TX300 Eye Tracker, Tobii Technology, Stockholm, Sweden; sampling rate 120  
18 Hz) and a custom-made chin rest. Participants were instructed to move their eyes as fast as  
19 possible between a left and right target on the screen and blink as little as possible. The target  
20 was a red fixation cross on a grey square (size 7x9 cm; angular size 2.67x3.44°). The target  
21 disappeared as soon as an eye movement that reached the target area was detected (margin  
22 1 cm). A short familiarisation session was conducted before the experiment started. The main  
23 muscles involved in this type of eye movement are the lateral and medial rectus eye muscles.  
24 We excluded participants with eye conditions and/or glasses from the study.

25

1 *Data analysis*

2 The point of gaze was calculated by averaging the position of the left and right eye. Based on  
3 that, we determined the time needed to shift the gaze from the first to the second target and  
4 back, corresponding to one movement cycle. From this data we determined the movement  
5 speed, which was averaged within three 10 s bins. Data from the motor slowing condition (30  
6 s tapping) were normalized to the control condition (10 s tapping) and submitted to a LMEM  
7 including the fixed factor *time* (1st – 3rd bin) and the random factor *participant*.

8

9 ***Experiment 3: Repetitive finger movements and characterizing the recovery period***

10 *Participants*

11 17 volunteers participated in this experiment (13 female, age 23.9 +/- 3.41 years, all right  
12 handed). All were free of medication, had no history of neurological or psychiatric disease and  
13 were naïve to the purpose of the experiment. All experimental protocols were approved by the  
14 research ethics committee of the canton of Zurich (KEK-ZH 2014-0242) and participants gave  
15 informed consent to the study.

16

17 *Behavioural paradigm*

18 Here we assessed motor slowing and the time course of its recovery during the subsequent  
19 break. Participants performed slowing conditions (30 s of repetitive alternating tapping of index  
20 and middle finger) and control conditions (10 s of the same tapping task performed in the  
21 slowing condition). The crucial experimental manipulation is that we varied the length of the  
22 break after tapping in 5 s steps (i.e. 5, 10, 15, 20, 25, 30 s) and investigated how break length  
23 influences motor slowing recovery (Figure 2). The experiment was conducted in four  
24 experimental blocks: 2 blocks required 10 s tapping episodes interleaved with breaks and 2  
25 blocks required 30 s tapping episodes interleaved with breaks. The order of these blocks was  
26 randomized across participants. Each block consisted of 31 tapping trials separated by 30

1 breaks. Within each block, the break length pseudo-randomly varied and 10 trials per break  
2 condition (i.e. 5, 10, 15, 20, 25, or 30 s length) were performed.

3

#### 4 *Data analysis*

5 First, we characterized tapping speed during the tapping episode by calculating the time  
6 period between two taps of the same finger. From this data, movement speed was calculated,  
7 averaged across three 10s bins and the data of the motor slowing condition (30 s tapping)  
8 were normalized to the control condition (10 s tapping). Next, data were grouped according to  
9 the length of the preceding or succeeding break and subjected to a LMEM including the fixed  
10 factors *time* (1st-3rd bin), *break length* (5, 10, 15, 20, 25, 30) and the random factor *participant*.

11

#### 12 *Recovery*

13 Next, we calculated a recovery index by subtracting the average movement speed of the last  
14 10 seconds before a break from the average movement speed of the first 10 s after a break.  
15 A higher recovery index indicates more recovery of tapping speed during the break. The  
16 recovery index was then submitted to a LMEM with the fixed factors *condition* (slowing vs.  
17 control) and *break length* (5, 10, 15, 20, 25, 30) to statistically assess the difference between  
18 the slowing and control conditions. Next, we estimated (i) the slope of motor slowing (i.e.  
19 decrease in movement speed) via linear regression from the movement speed across the  
20 three time bins (collapsed across break-length) and (ii) the slope of the recovery index (i.e.  
21 recovery speed) via a linear regression for each individual. The relationship between  
22 movement speed and recovery speed was then assessed using Pearson's *r*.

23

## 1 **Experiment 4: fMRI experiment**

### 2 *Participants*

3 In the first neuroimaging experiment, we applied fMRI while participants executed slowing  
4 versus control tapping conditions. 25 participants participated in the experiment (13 female,  
5 mean age: 23.6 +/- 3.4, right handed). All were free of medication, had no history of  
6 neurological or psychiatric disease and were naïve to the purpose of the experiment. All  
7 experimental protocols were approved by the research ethics committee of the canton of  
8 Zurich (KEK-ZH 2015-0537) and participants gave informed consent to the study.

9

### 10 *Behavioural task and analysis*

11 The experiment consisted of intervals of either slowing (30 s) or control (10 s) tapping with the  
12 index and middle finger, followed by a 30 s break. Before each condition participants were  
13 shown a visual get ready signal (randomly jittered between 2-3 s). The conditions were  
14 blocked within each fMRI run, that means four trials of 30s tapping were followed by four trials  
15 of 10s tapping (or vice versa). Participants performed 2 runs with 2 blocks each, leading to 16  
16 trials per condition. The order of conditions was counterbalanced across runs and the starting  
17 condition (i.e. whether the first run started with 10 or 30 s tapping) was counterbalanced across  
18 participants. Additionally, after each block there was an implicit baseline conditions of 20 s  
19 added (i.e. after a 30 s break when recovery was completed). Behavioural data was analysed  
20 as described for Experiment 3 and the normalized movement speed was subjected to a LMEM  
21 with the fixed factor *time* and the random factor *participant*. Motor slowing was defined as a  
22 significant main effect of *time*.

23

### 24 *fMRI acquisition and preprocessing*

25 fMRI scans were acquired with a Philips Ingenia 3T whole body scanner. Prior to the  
26 experiment, high resolution T1-weighted anatomical scans were acquired and used for image



1 registration and normalization (voxel size=1 mm<sup>3</sup>, 160 sagittal slices, matrix size=240x240,  
2 TR/TE = 8.3/3.9 ms). During the behavioural paradigm 360 volumes were acquired (voxel  
3 size= 2.75x2.75x3.3 mm, matrix size = 128x128, TR/TE=2500/35 ms, flip angle = 82, 40 slices  
4 acquired in interleaved order for full brain coverage). Preprocessing was performed using  
5 SPM12 (Wellcome Trust) with default parameters and consisted of realignment to the average  
6 functional image, segmentation of the anatomical image, normalization to MNI space and  
7 spatial smoothing (6 mm kernel at full-width-half maximum).

8

### 9 *fMRI data analysis*

10 All fMRI analyses were performed using SPM12. We first performed a parametric analysis.  
11 The first-level model of each participant consisted of a fixed-effects general linear model  
12 (GLM). The GLM design matrix included two regressors of interest: The first regressor  
13 reflected the tapping periods; the second regressor consisted of a parametric modulator  
14 reflecting a linear increase of motor slowing in time. Importantly, the movement speed was  
15 orthogonalized with respect to tapping. Note that the slowing and control conditions were  
16 modelled together (i.e. slowing consisted of a linear increase in 6 bins of 5 s, and control  
17 consisted of a linear increase in 2 bins of 5 s). We also modelled the get-ready periods (see  
18 behavioural task above) to regress out visual activation. All conditions were then convolved  
19 with a canonical hemodynamic response function (HRF) to account for the hemodynamic  
20 delay. Six head movement parameters (translation and rotation along the x,y and z-axis)  
21 estimated during realignment were added as regressors of no interest. The two regressors of  
22 interest were contrasted against the implicit baseline and then subjected to a second-level  
23 random-effects analysis across participants. The second level analysis was a single t-test  
24 contrasting the tapping and the slowing against zero. P-values smaller than 0.05 family-wise  
25 error (FWE) corrected for multiple comparisons were considered statistically significant.

26

1 Additionally, we also analysed the data via a conventional block design. The first-level model  
2 for each participant consisted of a fixed-effects GLM which included 10 regressors of interest.  
3 For the slowing conditions (30 s tapping followed by 30 s rest), we modelled the first, second  
4 and third 10 s bin during tapping and the first, second and third 10 s bin of the subsequent  
5 break. For the control condition (10 s tapping followed by 30 s break), we modelled one 10 s-  
6 block for the tapping period and the first, second and third 10 s bins of the subsequent break.  
7 We also modelled the get-ready periods (see behavioural task above), to regress out visual  
8 activation. All conditions were then convolved with a canonical hemodynamic response  
9 function (HRF) to account for the hemodynamic delay. Again head movement parameters  
10 were added as regressors of no interest. The ten regressors of interest were contrasted  
11 against the implicit baseline and entered into a second-level random-effects analysis across  
12 participants.

13  
14 The second-level model was a flexible (fractional) factorial design consisting of the factors  
15 condition (2-levels) and time (6-levels for the slowing condition, i.e. 3 levels of tapping and 3  
16 levels during break and 4-levels for the control condition, i.e. 1 level of tapping and 3 levels of  
17 break). The second-level analyses focused on identifying brain regions that were active during  
18 the motor task (i.e. average activation of tapping), and that changed activity over the course  
19 of motor slowing (i.e. contrasting the first 10 s of long tapping and the last 10 s of tapping).  
20 Additionally, we identified areas that exhibited a differential recovery during the break after the  
21 slowing vs. control condition (i.e. showed a significant *condition* × *time* interaction during the  
22 break).

23  
24 Finally, we contrasted the first 10 s of tapping during the slowing condition with the 10 s of  
25 control condition tapping to exclude systematic differences which might have been caused by  
26 pacing or other strategies. A p-value smaller than 0.05 family-wise error (FWE) corrected for

1 multiple comparisons was considered statistically significant. Localisation of functional  
2 clusters was aided by the anatomy toolbox (Eickhoff et al., 2005).

3

#### 4 ***Experiment 5: EEG experiment***

##### 5 *Participants*

6 Here we combined the behavioural paradigm with electroencephalography (EEG) to assess  
7 changes in the alpha (mu-rhythm, 8-12Hz), beta (14-30Hz) and gamma bands (30-40Hz),  
8 three intrinsic rhythms of sensorimotor cortex. 17 participants participated in the EEG  
9 experiment (10 female, mean age: 25.6 +/- 4.1, right handed). All were free of medication, had  
10 no history of neurological or psychiatric disease and were naïve to the purpose of the  
11 experiment. All experimental protocols were approved by the research ethics committee of the  
12 canton of Zurich (KEK-ZH 2014-0242) and participants gave informed consent to the study.

13

##### 14 *Behavioural paradigm and data analysis*

15 Similar to experiment 4 participants performed slowing (30 s tapping) and control trials (10 s  
16 tapping) followed by a break of 30 s. The tapping was performed with four fingers (index,  
17 middle, ring and little finger) of the left hand and participants were instructed to repetitively  
18 perform a pre-trained sequence (4-1-3-2-4; 1=little, 2=ring, 3=middle and 4=index finger) as  
19 quickly and accurately as possible. Twelve trials were performed per condition, leading to 24  
20 trials in total. The order of trials was pseudo-randomized. Tapping speed during the tapping  
21 episode was characterized by calculating the time period necessary to complete a sequence  
22 (i.e. time from first tap of a sequence to the first tap of the next sequence). From this data,  
23 movement speed was calculated, averaged across three 10s bins and the data of the motor  
24 slowing condition (30 s tapping) were normalized to the control condition (10 s tapping). The  
25 normalized movement speed was then subjected to a LMEM with the fixed factor time and the  
26 random factor participant.

1

## 2 *EEG acquisition*

3 EEG was acquired during the whole experiment using a 128-channel HydroCel Geodesic  
4 Sensor Net (GSN) with Ag/AgCl electrodes provided by Electrical Geodesics (EGI, Eugene  
5 Oregon, USA). This system uses the vertex (Cz) electrode as a physical reference. EEG  
6 recordings, electrooculograms for horizontal and vertical eye movements, and an  
7 electromyogram for the muscular noise associated with swallowing were recorded in parallel  
8 with a sampling frequency of 1000 Hz. During acquisition participants sat in a dimly lit room in  
9 front of a computer screen and performed a finger tapping task at maximum voluntary speed  
10 using the paradigm described above.

11

## 12 *EEG preprocessing*

13 Since EEG measurements during ongoing tapping are susceptible to non-neural movement  
14 artefacts, all analyses were performed for data during the break, i.e. when participants were  
15 resting. The analysis of the EEG data was performed offline using eeglab (Delorme and  
16 Makeig, 2004). EEG signals during the break were bandpass filtered off-line (3-40 Hz) and  
17 processed using independent component analysis (ICA) for the removal of ocular and  
18 muscular artefacts. After ICA decomposition the artefact ICs were automatically detected by  
19 correlating their power time-courses with the power time courses of the electric reference  
20 signals (horizontal and vertical electrooculogram and electromyogram). The data was down-  
21 sampled to 200 Hz and re-referenced to the common average (Liu et al., 2015) to remove the  
22 bias towards the physical reference site.

23

## 24 *EEG source localisation*

25 After preprocessing source localization of the EEG data was performed to extract the EEG  
26 signals from the three à priori defined regions of interest which showed increased activity with

1 increasing motor slowing (i.e. SM1, SMA and PMd). A forward head model was built with the  
2 finite element method (FEM) using a 12-tissue head template and the standard electrode  
3 positions for a 128-channel EGI cap. The head template was obtained from the IT'IS  
4 foundation of ETH Zurich (Iacono et al., 2015) and included 12-tissue classes (skin, eyes,  
5 muscle, fat, spongy bone, compact bone, cortical gray matter, cerebellar gray matter, cortical  
6 white matter, cerebellar white matter, cerebrospinal fluid and brain stem). Specific conductivity  
7 values were associated with each tissue class (i.e. skin 0.4348 S/m, compact bone 0.0063  
8 S/m, spongy bone 0.0400 S/m, CSF 1.5385 S/m, cortical gray matter 0.3333 S/m, cerebellar  
9 gray matter 0.2564 S/m, cortical white matter 0.1429 S/m cerebellar white matter 0.1099 S/m,  
10 brainstem 0.1538 S/m, eyes 0.5000 S/m, muscle 0.1000 S/m, fat 0.0400 S/m (Haueisen et  
11 al., 1997). The dipoles corresponding to brain sources were placed on a regular 6-mm grid  
12 spanning cortical and cerebellar gray matter. After the head model template was established,  
13 the brain activity in each dipole source was estimated by the exact low-resolution brain  
14 electromagnetic tomography (eLORETA (Pascual-Marqui et al., 2011)) for each participant.

15

### 16 *EEG Data analysis*

17 From source-localised EEG data, we extracted the first principle component from three  
18 regions of interest derived from the group peak-activation reflecting motor slowing in the fMRI  
19 experiment (SMA, MNI -6 -8 50; left PMd, MNI -28 -16 70 and left SM1, MNI -34 -20 55).

20 The data was then analysed for 30 s breaks after tapping. For each participant the signal was  
21 filtered to the alpha (8-14 Hz) and beta (15-30 Hz) band, rhythms which are classically  
22 associated with sensorimotor function. Then the data was rectified and smoothed with a sliding  
23 average filter (length 1 s, no overlap) to get an estimate of the amplitude over time. For  
24 statistical analysis the recovery time course was binned into three 10 s epochs (0-10 s, 10-20  
25 s, 20-30 seconds), and the mean amplitude per block was determined. The amplitude data of  
26 each frequency was then subjected to a LMEM with the fixed repeated factors *condition*

1 (slowing vs. control tapping) and *time* (0-10 s, 10-20 s, 20-30 seconds) and the random factor  
2 *participant*.

3

#### 4 ***Experiment 6: SICl experiment***

##### 5 *Participants*

6 Here we combined the behavioural paradigm with TMS to probe GABAergic inhibition during  
7 the recovery period. 13 participants participated in the experiment (4 female, mean age: 24.8  
8 +/- 2.5, all right handed) over two sessions. None of the participants reported contraindications  
9 to TMS, all were free of medication, had no history of neurological or psychiatric disease and  
10 were naïve to the purpose of the experiment. All experimental protocols were approved by the  
11 research ethics committee of the canton of Zurich (KEK-ZH 2014-0242) and participants gave  
12 informed consent to the study.

13

##### 14 *Behavioural paradigm*

15 The behavioural paradigm consisted of sequential tapping with four fingers of the right hand.  
16 The pre-trained sequence was 0-1-3-2-0 (0=thumb, 1=index, 2=middle and 3=ring finger).  
17 Again, we compared slowing (40 s of tapping) and control (10 s of tapping) conditions, each  
18 followed by a 40 s break. The two conditions were split into two sessions on two consecutive  
19 days (counter-balanced across participants) with 12 trials each. Behavioural data were  
20 analysed following the same procedures as for Experiment 5.

21

##### 22 *TMS protocol*

23 We assessed GABAergic inhibition in the primary motor cortex by using a short-interval  
24 intracortical inhibition TMS protocol (Kujirai et al., 1993). In short, SICl is measured with a  
25 paired-pulse (DP) TMS protocol where a subthreshold conditioning stimulus (CS) is applied  
26 shortly (2ms) before a suprathreshold test stimulus (TS). Typically, the amplitude of motor

1 evoked potentials (MEP) is attenuated when the CS+TS condition is compared to the TS  
2 condition only. This reduction has been linked to the activity of GABA<sub>A</sub>-ergic inhibitory circuits  
3 (Werhahn et al., 1999; Ziemann et al., 1996). Since SICl measurements are most reliable  
4 during rest, it was assessed during the breaks after tapping, i.e during the recovery period.  
5 TMS was performed with a figure-of-eight coil (70 mm) connected to two Magstim Bi-Stim2  
6 stimulators (Magstim, Withland, UK) and electromyography (EMG) was measured from the  
7 first dorsal interosseus (FDI) muscle and the abductor pollicis brevis (APB) muscle. Prior to  
8 the experiment the hot spot for the FDI muscle was determined. Neuronavigation (Brainsight,  
9 Rogue Research, Montreal, Canada) was used to ensure a constant coil position during the  
10 rest of the experiment. The coil was positioned over the left hemisphere, tangentially with the  
11 handle pointing backward and laterally at 45° away from the mid-sagittal line. Rest motor  
12 threshold (RMT) was then defined as the lowest stimulus intensity eliciting MEPs, which were  
13 larger than 50µV in at least five out of ten trials. The TS was set to 130% of RMT. For SICl the  
14 interstimulus interval was set to 2ms and the intensity of the CS was chosen such that it  
15 reduced MEP amplitude relative to the TS only condition by approximately 50%. Once the  
16 stimulation parameters were set, a Pre measurement consisting of 18 CS+TS and 18 TS  
17 (jittered inter stimulus interval  $\geq 4$  s) was obtained before the behavioural experiment. During  
18 the tapping experiment, TMS was applied during the 40 s break so that 3 CS+TS and 3 TS  
19 were measured between second 3.5 and 33.5 in pseudo-randomized order. This resulted in  
20 24 CS+TS and 24 TS for each tapping condition and time point. After the tapping experiment,  
21 a Post measurement was performed which again consisted of 18 CS+TS and 18 TS .

22

### 23 *TMS Data analysis*

24 All analyses focused on FDI muscle effects since it was used to define the hotspot and RMT.  
25 Background EMG was quantified by taking the root mean square of the EMG signal between  
26 10 and 110ms before the first TMS pulse was delivered. Trials with background EMG above

1 0.1 mV were removed from further analyses. For the remaining trials, mean and standard  
2 deviation of the background EMG was calculated for each participant, and for the TS and  
3 CS+TS trials separately. Trials with a background EMG  $>$  mean  $\pm$  2.5 standard deviations  
4 were also excluded from further analysis. During all TMS measurements, MEP size was  
5 determined as the peak-to-peak amplitude. MEPs were considered outliers and excluded from  
6 the analysis if they were greater than  $Q3 + 1.5 \times (Q3 - Q1)$  or less than  $Q1 - 1.5 \times (Q3 - Q1)$ , where  
7  $Q1$  and  $Q3$  are equal to the first and third quartiles, respectively (Zhang et al., 2014). Based  
8 on these criteria 17% of the trials were removed from further analyses. SICl was then  
9 calculated according to the following formula: Inhibition =  $(1 - (CS+TS/TS))$ , i.e. low values  
10 indicate low inhibition while large values indicate high inhibition.

11  
12 Inhibition was averaged separately for the Pre and Post measurements, as well as for three  
13 time intervals during the break (3.5 -22 s, 7.5-27.5 s, 12.5-33.5 s ) either following the slowing  
14 condition (i.e. during pronounced recovery) or the control condition (i.e. during minor  
15 recovery). The data were then subjected to a LMEM with the fixed factors condition (slowing  
16 vs. control ) and time (Pre, 3.5 -22 s, 7.5-27.5 s, 12.5-33.5 s , Post), and the random factor  
17 participant.

18

19

## 20 ***Experiment 7: Surround inhibition experiment***

### 21 *Participants*

22 Twenty-six adults (14 female, mean age and standard deviation: 24  $\pm$  3 years, range: 18-32  
23 years) participated in the experiment after providing written informed consent. All participants  
24 were right handed (mean laterality index and standard deviation 93  $\pm$  12%, range: 60-100%).  
25 None of the participants reported contraindications to TMS, all were free of medication, had  
26 no history of neurological or psychiatric disease and were naïve to the purpose of the



1 experiment. Seven participants had to be excluded because they did not show a clear  
2 surround inhibition effect during the Pre measurement (see below) leading to a final sample  
3 size of 19 participants.

4

#### 5 *General setup*

6 Participants were comfortably seated in front of a desk. Their right forearm rested on the desk  
7 in a neutral position with a slight shoulder abduction and about 60° elbow flexion. The palm  
8 and the forearm of the participants were strapped to a custom-made wooden structure which  
9 only allowed movement of the thumb. There was a computer monitor placed about 70 cm in  
10 front of the participant.

11

12 MEPs were recorded from the right first dorsal interosseus (FDI), opponens pollicis (OP),  
13 abductor digiti minimi (ADM) and extensor pollicis longus (EPL) with surface  
14 electromyography (Bagnoli™, Delsys, USA). One Bagnoli surface EMG sensor was placed  
15 on each of the target muscles. EMG data were sampled at 5000 Hz (CED Power 1401,  
16 Cambridge Electronic Design, UK), amplified, band pass filtered (5-1000 Hz), and stored on  
17 a PC for off-line analysis.

18

#### 19 *Behavioural paradigm*

20 During each testing session, participants were asked to tap with their right thumb as fast as  
21 possible. Tapping was measured with a custom made device incorporating a vertical force  
22 sensor. Participants had their hand placed upright and performed horizontal taps against the  
23 vertical sensor. Motor slowing (30 s tapping followed by 60 s break) and the control condition  
24 (10 s tapping followed by 60 s break ) were tested on two different days (order  
25 counterbalanced across participants). The tapping instruction was given on a screen in front  
26 of the participants. During the tapping trial “Tap” was displayed on the screen while during the

1 breaks “Rest” was displayed. In the first session, participants were introduced to all  
2 measurements and performed a familiarisation block. There were 20 tapping trials in each  
3 block, which were separated by 60 s blocks to ensure full recovery. Behavioural data was  
4 analysed by calculating time between taps. From this data, movement speed was calculated,  
5 averaged across three 10 s bins and the data from the motor slowing condition (30 s tapping)  
6 were normalized to the control condition (10 s tapping). The normalized data was subjected  
7 to a LMEM including the fixed factor time and the random factor participant.

8

### 9 *Coactivation Analysis*

10 Coactivation of EPL and APB, the two main effectors during thumb tapping, was determined  
11 by calculating the overlap in EMG signals. EMG signals were recorded at 1000 Hz during  
12 tapping and analysed offline. EMG signals were high-pass filtered at 20 Hz and rectified, then  
13 a 10 Hz low-pass filter was used on the rectified signal to extract the envelope. The amount  
14 of coactivation (coactivation index) was defined as the joint area under the curve of the two  
15 signals, normalized to the area under the curve of the agonist (i.e. APB; (Frost et al., 1997).  
16 The coactivation index was calculated and averaged across trials in bins of 10s and the data  
17 of the slowing condition (30 s) was normalized to the data of the control condition (10 s). The  
18 normalized data was then subjected to a LMEM incorporating the fixed factor *time* and the  
19 random factor *participant*.

20

### 21 *TMS preparation*

22 TMS was performed with a figure-of-eight coil (loop diameter 70 mm) connected to a Magstim  
23 Bi-stim2 stimulator (Magstim, Withland, UK). The coil was positioned over the hotspot of ADM  
24 (i.e. the location with the largest and most consistent MEPs) with the optimal orientation (i.e.  
25 the coil was positioned over the left hemisphere, tangentially with the handle pointing  
26 backward and laterally at 45° away from the mid-sagittal line) for evoking a descending volley

1 in the cortico-spinal tract. The same coil orientation was used for all participants. In each  
2 testing session the hotspot was determined the same way as in the SICI experiment (see  
3 above). In all sessions a neuronavigation system (Brainsight, Rogue resolutions LTD, UK)  
4 was used to ensure the same location was stimulated.

5 Rest motor threshold (RMT), defined as the lowest stimulus intensity eliciting MEPs >50  $\mu$ V in  
6 at least five out of 10 consecutive trials, was determined to the nearest 1% of maximum  
7 stimulator output. In each testing session, the RMT was determined. During the testing  
8 sessions stimulation intensity was set to 140% of the RMT.

9

#### 10 *Determining surround inhibition*

11 The main aim of experiment 7 was to determine surround inhibition after slowing vs. control  
12 tapping. Surround inhibition in humans can be measured by comparing the excitability  
13 between movement execution and rest of a non-involved muscle, surrounding the actual  
14 movement effector. Here we used the EPL as movement effector and measured the  
15 excitability of FDI either during movement execution of EPL or rest. To that end, participants  
16 were instructed to perform a brief tap after a beep tone. TMS was triggered by the EMG activity  
17 of EPL (self-triggered TMS by the thumb extensor). The trigger level of the EMG activity was  
18 set at 100  $\mu$ V peak-to-peak EMG amplitude (this value is chosen to avoid triggering while  
19 resting (Sohn and Hallett, 2004)). Half of the TMS pulses were delivered 3 ms after the trigger  
20 ( $TMS_{Move}$ ) to probe surround inhibition while the other half were delivered 2 s after the trigger  
21 ( $TMS_{Con}$ ), which served as a control condition since participants were again at rest. The order  
22 of TMS pulses were semi-randomized. “Beep” tones were given at random intervals between  
23 7 and 9 s. Participants were asked to tap horizontally on the sensor board briefly after each  
24 beep tone with a self-paced delay. All participants were instructed that it is not necessary to  
25 react as fast as possible.

1 These measurements were performed during to the experiment (Pre) and immediately after  
2 the tapping intervention (Post), as well as during the break after each tapping trial. In both Pre  
3 and Post TMS measurements, 15 TMS<sub>Move</sub> and 15 TMS<sub>Con</sub> pulses were applied. During each  
4 60 s break following either motor slowing or control tapping, 3 TMS<sub>Move</sub> and TMS<sub>Con</sub> were  
5 applied. The order of TMS pulses was semi-randomized. The first tone was played 5 s after  
6 the last tap and subsequent tones were played randomly every 7-9 s. Surround inhibition was  
7 determined by taking the quotient of TMS<sub>Move</sub> divided by TMS<sub>Con</sub>.

8

### 9 *Data analyses TMS*

10 For all TMS measurements, MEP size was determined by peak-to-peak amplitude. MEPs  
11 were considered outliers and excluded from the analysis if they were greater than Q3+1.56  
12 (Q3-Q1) or less than Q1-1.56 (Q3-Q1), where Q1 and Q3 are equal to the first and third  
13 quartiles, respectively. MEPs were pooled separately for TMS<sub>Move</sub> and TMS<sub>Con</sub>. Background  
14 EMG (bgEMG) was quantified by the root mean square error of the EMG signal in an interval  
15 between 5 and 105 ms before TMS stimulation. For each participant, the mean and standard  
16 deviation (SD) of the bgEMG score was calculated separately for each session. Trials with a  
17 bgEMG score greater than the mean + 2.5 SDs were removed from the analysis.

18

19 According to these criteria 96.00% (OP=95.49%, FDI =95.81%, EPL=96.86%, ADM= 95.84%)  
20 of the trials were included in the analysis. Surround Inhibition was then calculated for the FDI  
21 muscle by dividing the MEPs from TMS<sub>Move</sub> by the MEPs from TMS<sub>Con</sub>. A value smaller than 1  
22 reflects inhibition of FDI relative to EPL/OP, whereas a value larger than 1 reflects facilitation  
23 of FDI relative to EPL/OP. Surround Inhibition was calculated separately for Pre and Post, as  
24 well as for the three time points during the break (5-14 s, 19-32 s, 33-50 s). Since we were  
25 interested in the change of surround inhibition during slowing relative to the control condition,  
26 we normalized the data during the break (5-14 s, 19-32 s, 33-50 s) to the individual Pre

1 measurement. The data were then subjected to a LMEM with the fixed factors *condition*  
2 (slowing vs. control) and *time* (5-14 s, 19-32 s, 33-50 s), and the random factor *participant*.

### 3 Figures and Legends

A

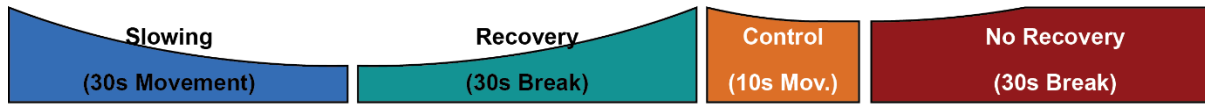

B

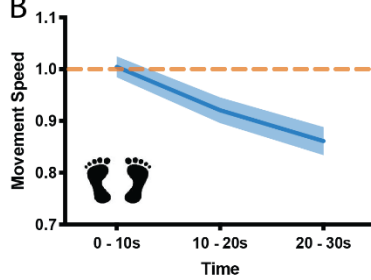

C

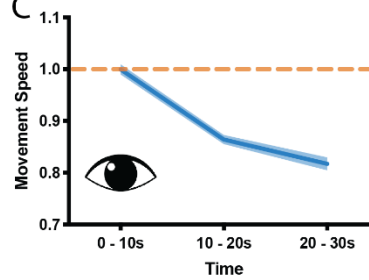

D

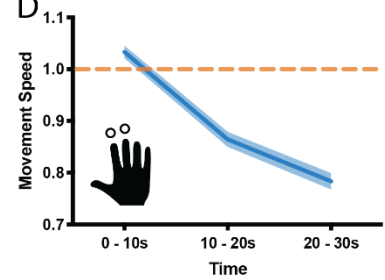

4

5 **Figure 1** (A) General behavioural paradigm. Participants were asked to either perform long  
6 ( $\geq 30$  s) or short (10 s) blocks of repetitive movements, followed by breaks of at least 30 s.

7 Movement speed was analysed in movement cycles per 10 s. (B-C) Motor Slowing (blue line)  
8 normalized to control condition (orange line) occurred independent of the involved effector  
9 and was present during foot tapping (B), repetitive eye movements (C) and repetitive finger

10 movements (D). Note that the data in (D) corresponds to the experiment depicted in Figure 2,  
11 where subjects had a break of at least 30 s. All data mean  $\pm$  sem.

12

1

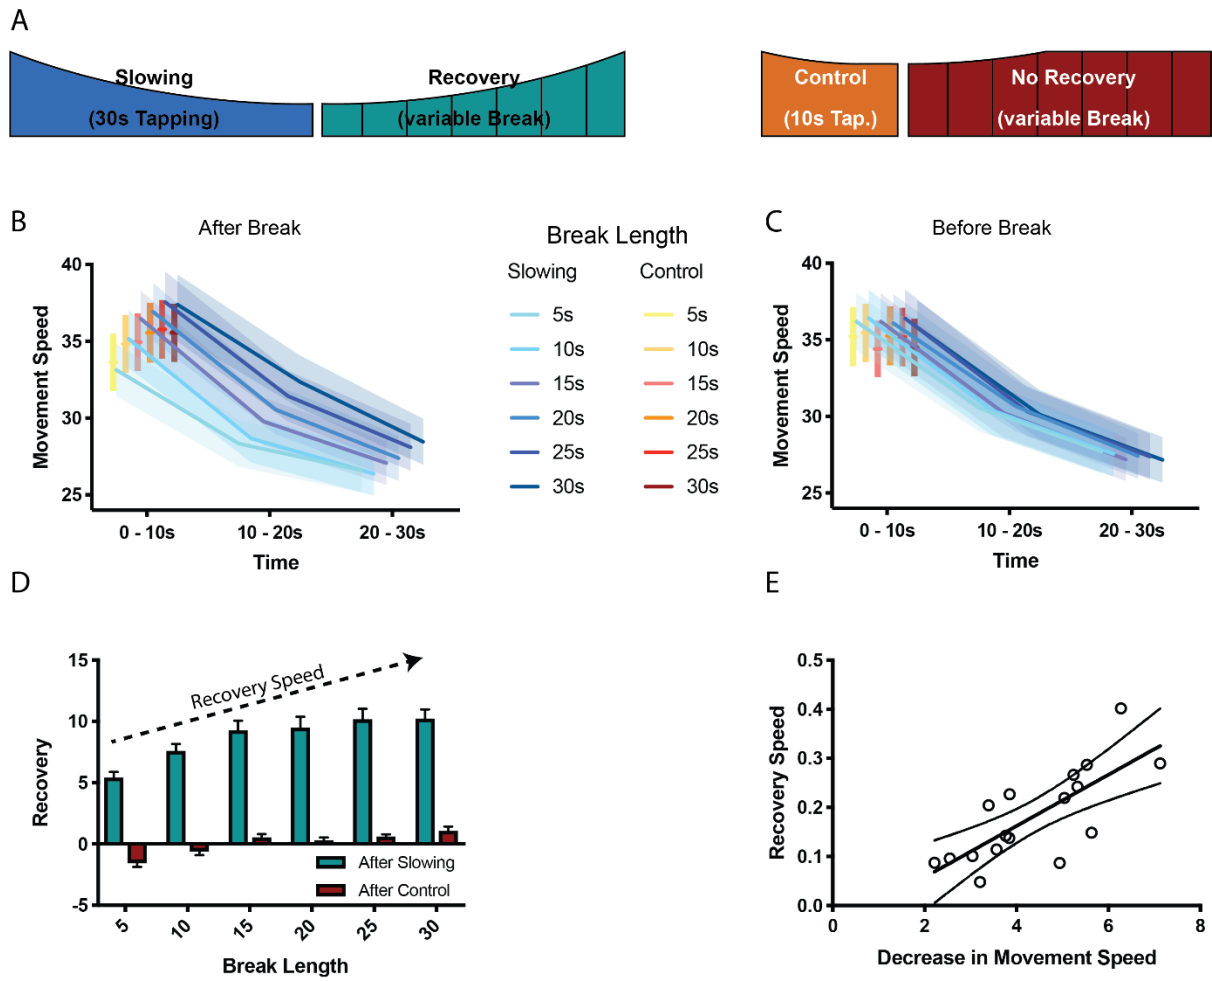

2

3 **Figure 2** Results of the recovery experiment. (A) Experimental paradigm to characterize the  
4 recovery process after motor slowing. Participants were instructed to tap with two fingers for  
5 30 s (slowing condition) or 10 s (control condition) followed by breaks of different duration (5-  
6 30 s). (B) Initial movement speed was lower when subjects had less time to recover. (C) No  
7 such pattern was observed before the break. (D) Calculating the recovery (i.e. comparing  
8 movement speed immediately before and after the break) shows that movement speed  
9 recovers within the first 20s of the break. (E) The recovery speed was directly correlated to  
10 the decrease in movement speed across participants. All values mean +/- sem.

11

12

1

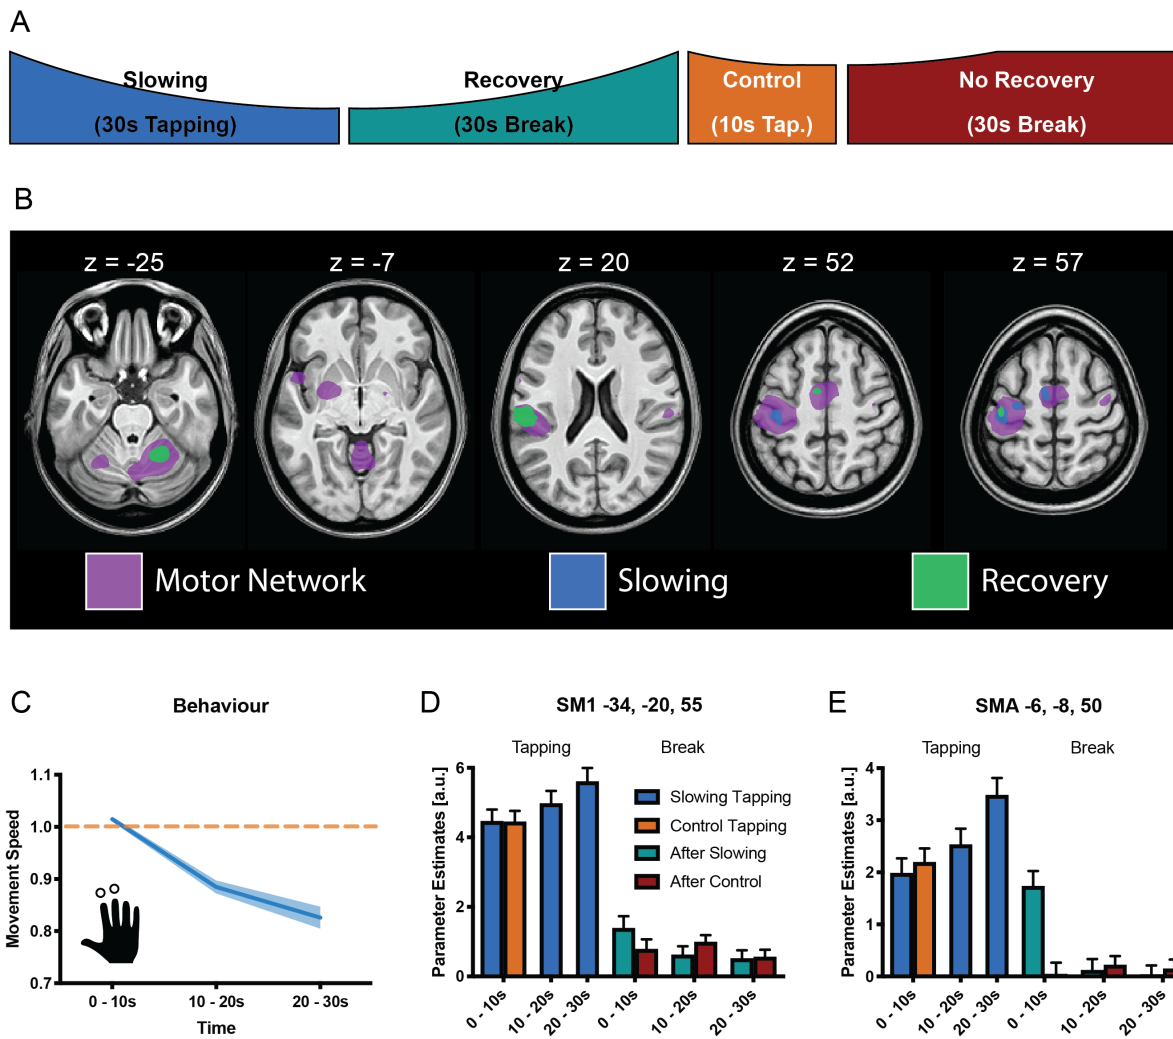

2

3 **Figure 3** Results of the functional magnetic resonance (fMRI) experiment. (A) Participants  
 4 performed slowing (30 s) or control (10 s) two-finger tapping followed by a break of 30 s in the  
 5 fMRI scanner. (B) A typical motor network was activated during tapping (pink,  $pFWE < 0.05$ ),  
 6 however, only areas in primary sensorimotor cortex, premotor cortex and supplementary  
 7 motor area (SMA) showed increased activity with decreased tapping speed (blue,  $pFWE <$   
 8  $0.05$ ). Additionally, cerebellum and secondary somatosensory cortex show decreasing  
 9 activation during recovery (green,  $pFWE < 0.05$ ) (C) Motor Slowing during the behavioural task  
 10 (blue line) normalized to control condition (orange line). (D,E) Parameter estimates from  
 11 primary sensorimotor cortex and SMA show increased activity within those areas with

1 decreasing movement speed and subsequent recovery of this effect during the break. All

2 values mean +/- sem.

3



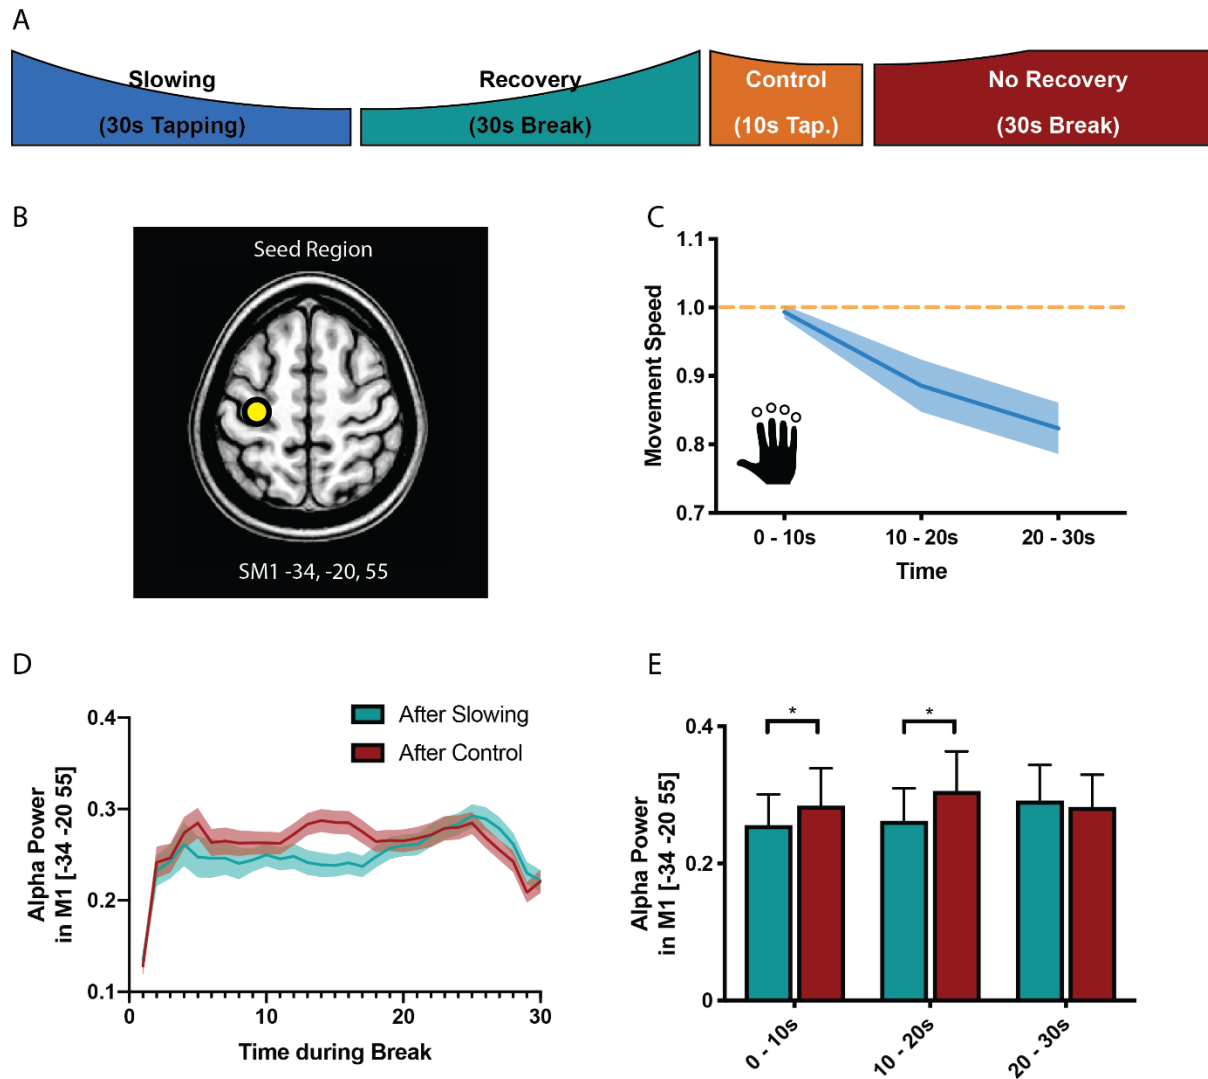

1

2 **Figure 4** Results of the electroencephalography (EEG) experiment. (A) Participants  
 3 performed slowing (30 s) or control (10 s) sequence tapping followed by a break of 30 s, while  
 4 EEG was measured. (B) Source localization was performed using eLoreta and fluctuations of  
 5 alpha power extracted from primary sensorimotor cortex (SM1). (C) Motor slowing during the  
 6 behavioural task (blue line) normalized to control condition (orange line). (D) Power over time  
 7 during breaks after tapping (green = break after slowing tapping, red = break after control  
 8 tapping, dotted lines = sem.). (E) Same as (D), binned in 10 s blocks for statistical analysis.

9 All values mean +/- sem. \*p <0.05

10

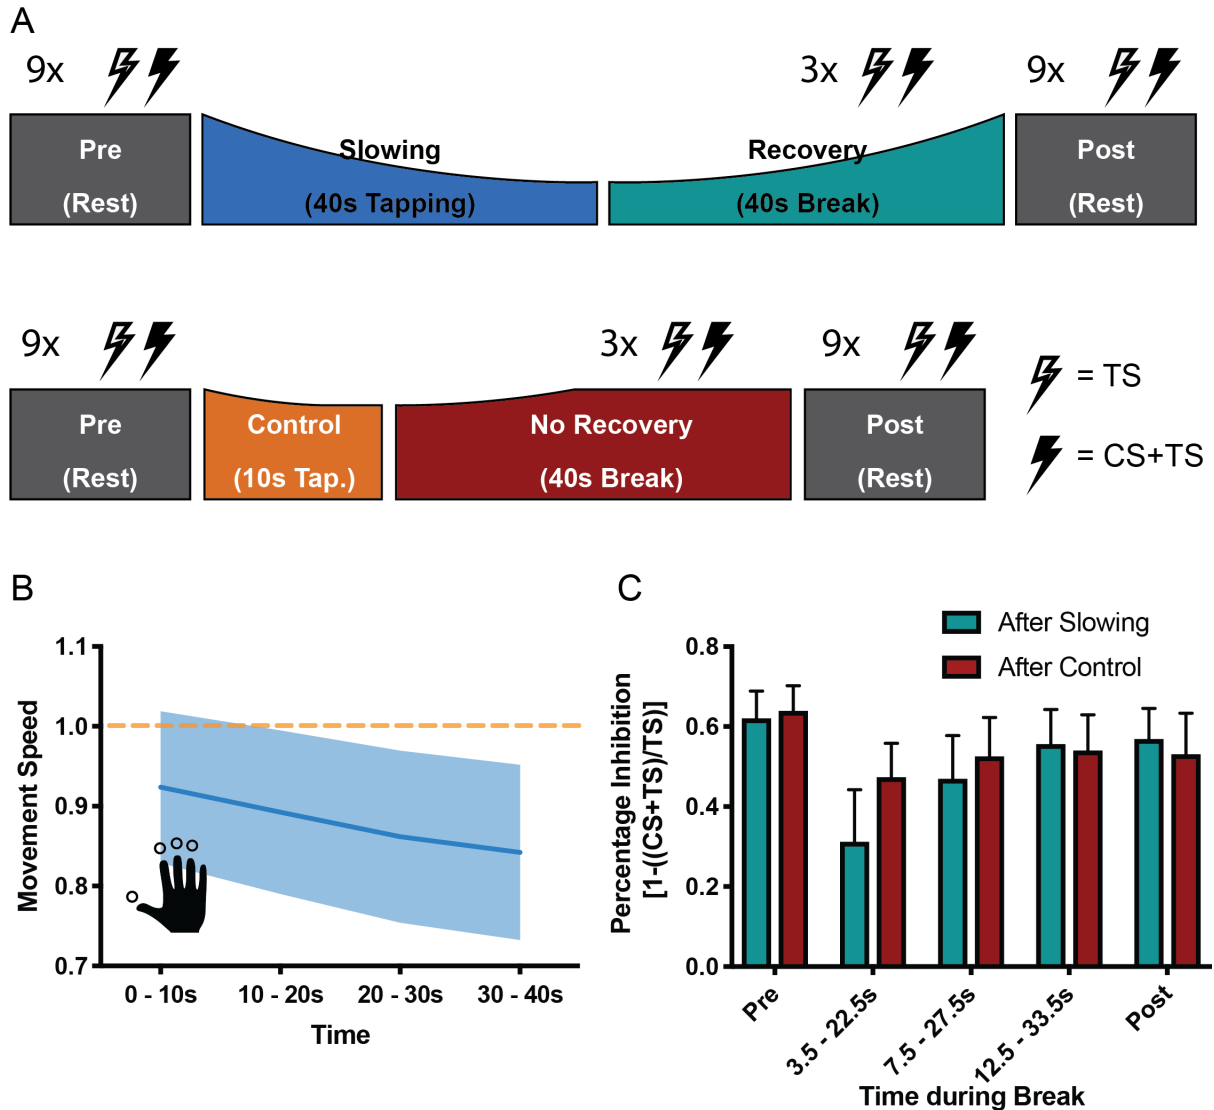

1

2 **Figure 5** Results of the short latency intracortical inhibition (SICI) experiment. (A) SICI was  
 3 measured before (Pre) and after (Post), as well as during the break after either slowing (40 s)  
 4 or control (10 s) tapping. (B) Motor slowing during the behavioural task (blue line) normalized  
 5 to control condition (orange line). (C) Percentage Inhibition of primary motor cortex before  
 6 (Pre), for the first (0-10 s), second (10-20 s) and third (20-30 s) conditioning stimulus during  
 7 the break, and at the end of the session (Post) where participants executed either the slowing  
 8 (green) or control (red) tapping condition. It can be seen that slowing leads to disinhibition of  
 9 primary motor cortex immediately after tapping. All values mean +/- sem.

10

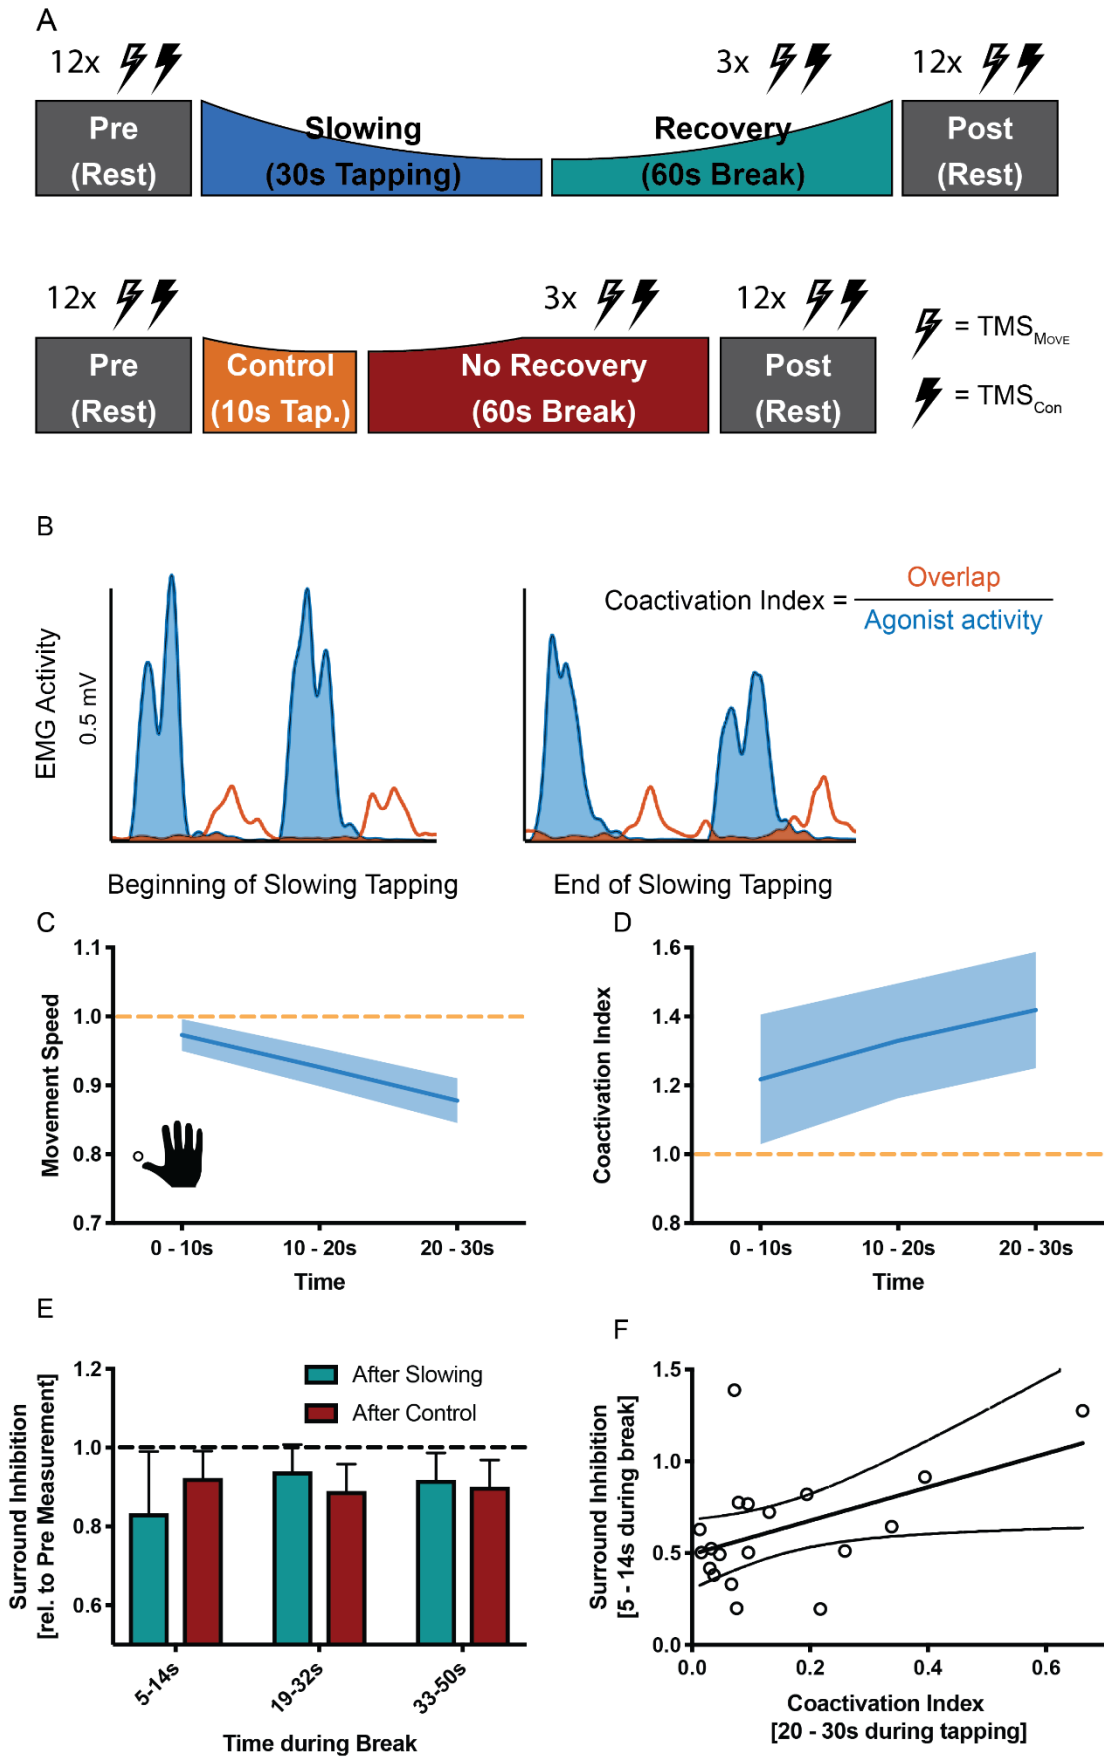

1 **Figure 6** Results of the surround inhibition experiment. (A) Surround inhibition was measured  
2 before (Pre) and after (Post), as well as during the break after either slowing (30 s) or control  
3 (10 s) tapping. The length of the break was increased to 60 s to have enough time for the  
4 measurements. (B) The amount of coactivation between agonistic and antagonistic muscles  
5 was calculated by dividing the overlap between the smoothed and rectified EMG of the two  
6 muscles normalized to the area under the curve of the agonist. (C) Movement speed decrease  
7 in the surround inhibition experiment. (D) Increase in coactivation index between OP and EPL  
8 over the course of motor slowing. (E) Difference in surround inhibition normalized to Pre-  
9 measurements. Surround inhibition is decreased immediately after motor slowing and returns  
10 to baseline over the course of the break. (F) The amount of coactivation immediately before  
11 the break predicted the amount of surround inhibition at the beginning of the break ( $R^2=0.23$ ,  
12  $p=0.039$ ). Note that surround inhibition in panel (F) is the absolute amount of surround  
13 inhibition, whereas it is normalized to the Pre measurement in panel (E). All values mean +/-  
14 sem.  
15

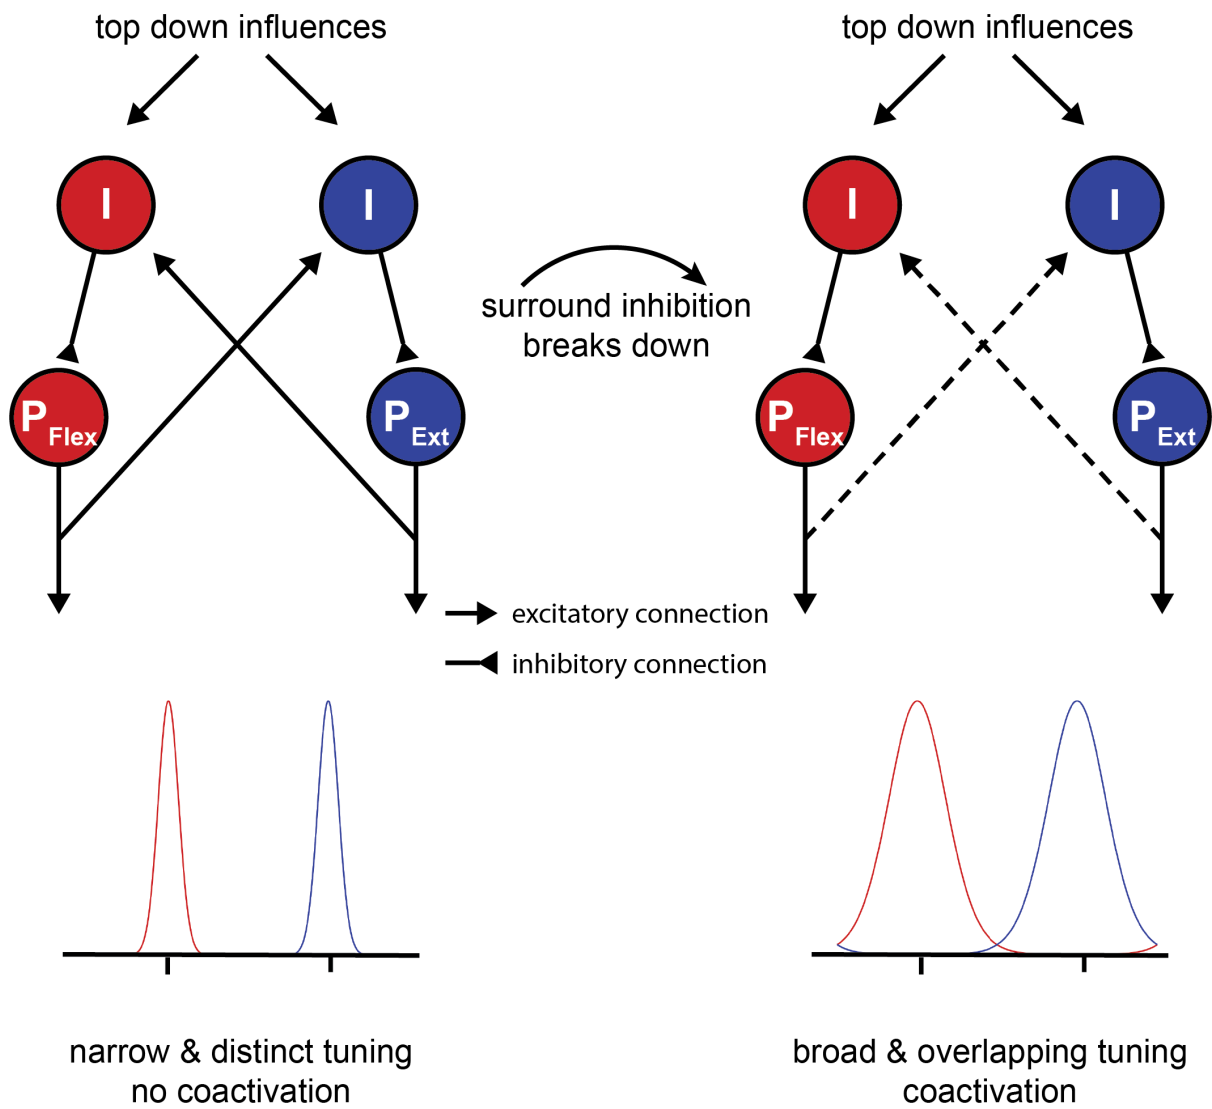

1

2

3

4

5

6

7

8

9

10

**Figure 7** Potential mechanism of motor slowing. Two populations of pyramidal neurons (P) control agonistic ( $P_{Flex}$ ) and antagonistic ( $P_{Ext}$ ) movements. The tuning curve of those neurons is under control of inhibitory interneurons (I). At the beginning of tapping inhibition is strong leading to sharp tuning curves and consequently distinct movement activation patterns. Over the course of tapping inhibition breaks down and consequently the tuning curves become broader leading to overlapping activation patterns (i.e. coactivation). Note that the breakdown of inhibition here is shown as a direct input, however, inhibition could also break down due to reduction of afferent excitatory input to the inhibitory interneurons.

1

## 2 Tables

3

|                  | Speed during first 10s |              | Speed within 30s |               | N Subjects | N Trials |
|------------------|------------------------|--------------|------------------|---------------|------------|----------|
|                  | First Trial            | Last Trial   | First 10s        | Last 10s      |            |          |
| 2-finger tapping | 39.48 ± 1.61           | 37.00 ± 1.24 | 37.89 ± 1.12     | 31.82 ± 1.04  | 25         | 16       |
| Foot tapping     | 50.00 ± 4.16           | 53.67 ± 4.20 | 55.167 ± 3.25    | 47.233 ± 2.89 | 12         | 20       |
| Eye Movement     | 14.33 ± 0.83           | 16.83 ± 0.95 | 15.817 ± 0.77    | 12.933 ± 0.67 | 12         | 20       |

mean ± standard error of the mean, all values Movement Cycles per 10s

4

5 **Table 1** Comparison of movement speed (measured in movement cycles per 10s) during the  
6 first 10 s of the first trial and last trial for different effectors, as well as movement speed within  
7 a 30 s trial (first vs. last 10 s). The results show that movement speed at the beginning of each  
8 trial is stable, whereas movement speed decreased significantly within a trial. All values mean  
9 +/- sem.

10

## 11 Supplemental Information

12

| cluster-level |             |        |        | peak-level  |             |        |        |        | MNI-coord.  | Anatomical Label              |
|---------------|-------------|--------|--------|-------------|-------------|--------|--------|--------|-------------|-------------------------------|
| p(FWE-corr)   | p(FDR-corr) | equivk | p(unc) | p(FWE-corr) | p(FDR-corr) | T      | equivZ | p(unc) | x,y,z (mm)  |                               |
| 0.000         | 0.000       | 2443   | 0.000  | 0.000       | 0.000       | 17.170 | 7.800  | 0.000  | 18 -52 -22  | right Cb V/VI/VIIb            |
|               |             |        |        | 0.000       | 0.004       | 9.490  | 6.060  | 0.000  | 6 -74 -38   |                               |
|               |             |        |        | 0.001       | 0.048       | 7.910  | 5.500  | 0.000  | 14 -66 -40  |                               |
| 0.000         | 0.000       | 2124   | 0.000  | 0.000       | 0.000       | 16.490 | 7.700  | 0.000  | -48 -22 50  | left BA1/BA2/BA3b/BA4a/BA4p   |
|               |             |        |        | 0.000       | 0.000       | 14.250 | 7.280  | 0.000  | -42 -26 60  |                               |
|               |             |        |        | 0.000       | 0.000       | 13.790 | 7.190  | 0.000  | -38 -20 52  |                               |
| 0.000         | 0.000       | 498    | 0.000  | 0.000       | 0.002       | 9.990  | 6.220  | 0.000  | -52 -24 18  | left S2/OP1                   |
| 0.000         | 0.000       | 620    | 0.000  | 0.000       | 0.004       | 9.660  | 6.120  | 0.000  | -2 -4 54    | left/right BA6 (SMA)          |
|               |             |        |        | 0.010       | 0.297       | 6.740  | 5.000  | 0.000  | 6 -6 70     |                               |
| 0.000         | 0.000       | 263    | 0.000  | 0.000       | 0.004       | 9.480  | 6.060  | 0.000  | -22 -2 -6   | left Pallidum/Putamen         |
|               |             |        |        | 0.020       | 0.528       | 6.370  | 4.830  | 0.000  | -32 -6 0    |                               |
| 0.000         | 0.000       | 425    | 0.000  | 0.000       | 0.007       | 9.090  | 5.930  | 0.000  | -46 6 -2    | left Central opercular cortex |
|               |             |        |        | 0.000       | 0.025       | 8.340  | 5.660  | 0.000  | -40 -2 16   |                               |
|               |             |        |        | 0.025       | 0.624       | 6.250  | 4.770  | 0.000  | -58 6 2     |                               |
| 0.002         | 0.070       | 32     | 0.035  | 0.001       | 0.031       | 8.170  | 5.600  | 0.000  | -58 4 28    | left BA6/BA44                 |
| 0.000         | 0.006       | 80     | 0.002  | 0.004       | 0.176       | 7.150  | 5.190  | 0.000  | -26 -60 -22 | left CB V/VI                  |
| 0.002         | 0.070       | 32     | 0.035  | 0.006       | 0.221       | 6.970  | 5.110  | 0.000  | -14 -20 8   | left Thalamus                 |
| 0.002         | 0.070       | 34     | 0.030  | 0.010       | 0.297       | 6.730  | 5.000  | 0.000  | 40 -12 56   | right BA6                     |

13

14 **Supplemental Table S1** Peak fMRI activations during tapping

15

| Session      | RMT        | CS         | TS          |
|--------------|------------|------------|-------------|
| 40 s tapping | 43.5 ± 6.2 | 37.5 ± 8.5 | 55.2 ± 10.3 |
| 10 s tapping | 43.6 ± 7.4 | 34.8 ± 6.2 | 54.4 ± 9.5  |

1 all values %MSO

2 **Supplemental Table S2** Rest motor threshold, conditioning stimulus and test stimulus  
3 intensities as % maximum stimulator output (%MSO), showing that stimulus intensities were  
4 comparable across sessions (all values mean +/- standard deviation).

| TMSCon (FDI) | Pre        | Block1     | Block2     | Post       | RMT        |
|--------------|------------|------------|------------|------------|------------|
| 10s          | 3.0 (0.41) | 3.1 (0.44) | 3.2 (0.43) | 3.0 (0.40) | 46.4 (7.7) |
| 30s          | 3.1 (0.49) | 2.8 (0.48) | 3.1 (0.50) | 3.1 (0.47) | 45.5 (8.4) |

6  
7 **Supplemental Table S3** Average motor evoked potentials of the control stimulus in mV for  
8 Pre and Post measurements, as well as during the break after 30 s and 10 s tapping showing  
9 that the control stimulus did not change during the experiment. Additionally the rest motor  
10 threshold (RMT) for both sessions in percentage of maximum stimulator output, showing that  
11 the RMT was comparable.
